# Supplementary material for: The Benzothiazine Core as a Novel Motif for DNA-Binding Small Molecules
Source: MDPI journal article supplement (doi:10.3390/molecules28114499), 2023-06-01
Supplement: s1 [file s1]

## Supplementary material

### The benzothiazine core as a novel motif for DNA-binding small molecules

Milena Mlakić <sup>1,†</sup>, Ivona Čipor <sup>2,†</sup>, Petra Kovačec <sup>1,3</sup>, Goran Kragol <sup>3</sup>, Ana Ratković <sup>3</sup>, Tatjana Kovačević <sup>3</sup>, Rahela Zadravec <sup>3</sup>, Valentina Milašinović <sup>4</sup>, Krešimir Molčanov <sup>4</sup>, Ivo Piantanida <sup>2,\*</sup> and Irena Škorić <sup>1,\*</sup>

1 Department of Organic Chemistry, Faculty of Chemical Engineering and Technology, University of Zagreb, Marulićev trg 19, HR-10000 Zagreb, Croatia; mdragojev@fkit.hr (M.M.); pkovacec@fkit.hr (P.K.)

2 Division of Organic Chemistry and Biochemistry, Ruđer Bošković Institute, icipor@irb.hr (I.Č.)

3 Chemistry, Selvita Ltd., Prilaz Baruna Filipovića 29, HR-10000 Zagreb, Croatia; goran.kragol@selvita.com (G.K.); ana.ratkovic@selvita.com (A.R.); tatjana.kovacevic@selvita.com (T.K.); rahela.zadravec@selvita.com (R.Z.)

4 Division of Physical Chemistry, Rudjer Bošković Institute, Bijenička cesta 54, HR-10000 Zagreb, Croatia; valentina.milasnovic@irb.hr (V.M.); kresimir.molcanov@irb.hr (K.M.)

## Contents

|                                                                 |           |
|-----------------------------------------------------------------|-----------|
| <b>1. Physico-chemical properties of aqueous solutions.....</b> | <b>2</b>  |
| <b>2. Interactions with ds-DNA/RNA .....</b>                    | <b>5</b>  |
| <b>3. NMR spectra of benzothiazines.....</b>                    | <b>16</b> |
| <b>4. MS spectra and HRMS analyses of benzothiazines.....</b>   | <b>26</b> |

## 1. Physico-chemical properties of aqueous solutions

All compounds were dissolved in DMSO at  $1 \times 10^{-3}$  M. The stock solutions were kept at +4 °C and working aliquots were kept at +25 °C. No visible precipitation in working solutions was noticed. The experiments were performed in MQ water at room temperature (25 °C).

### 1.1. UV/Vis spectra

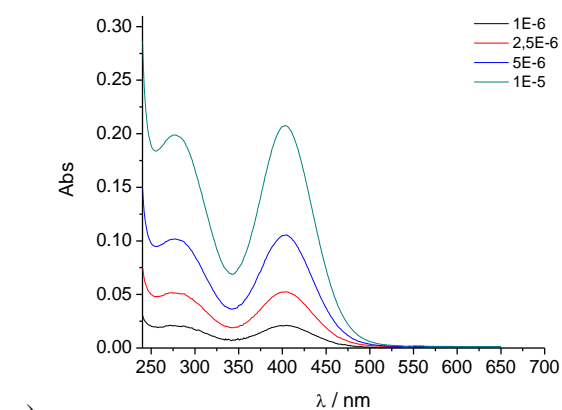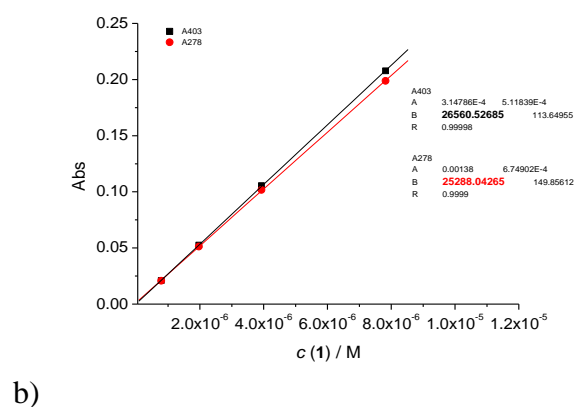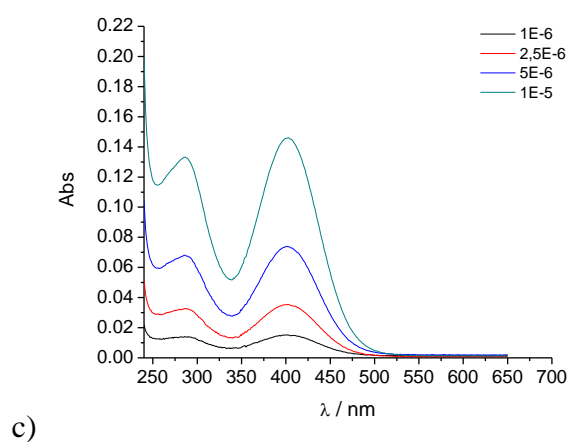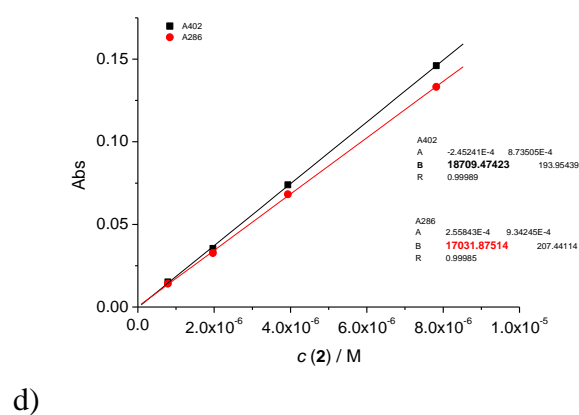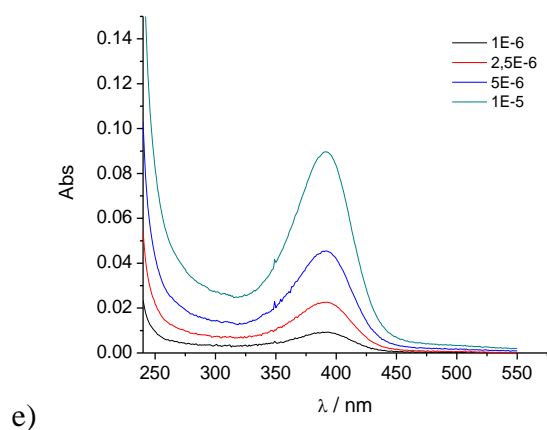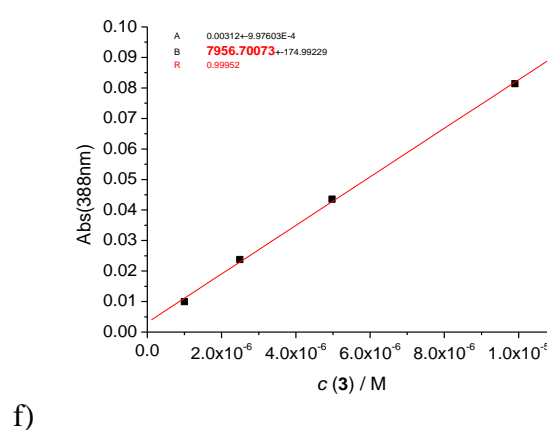

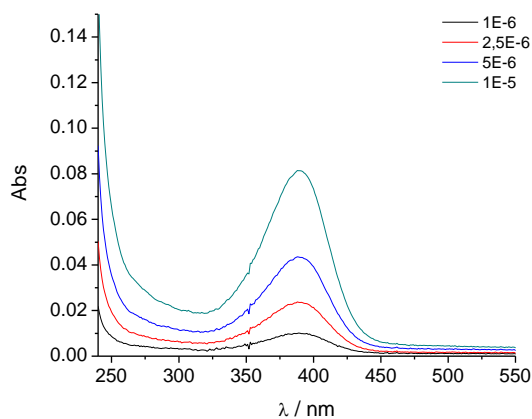

g)

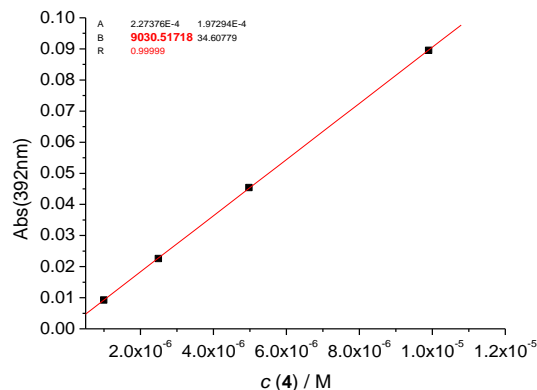

h)

**Figure S1.** a) dependence of UV/Vis spectra on concentration increase ( $1 \times 10^{-6}$  M to  $1 \times 10^{-5}$  M) for **1**, b) calibration at  $\lambda_{\max} = 403$  nm (black) and  $\lambda_{\max} = 276$  nm for **1**, c) dependence of UV/Vis spectra on concentration increase for **2**, d) calibration at  $\lambda_{\max} = 402$  nm (black) and  $\lambda_{\max} = 286$  nm (red) for **2**, e) dependence of UV/Vis spectra on concentration increase for **3**, f) calibration at  $\lambda_{\max} = 388$  nm for **3**, g) dependence of UV/Vis spectra on concentration increase for **4**, h) calibration at  $\lambda_{\max} = 392$  nm for **4**.

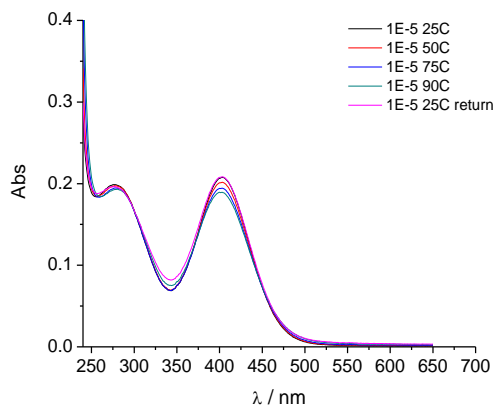

a)

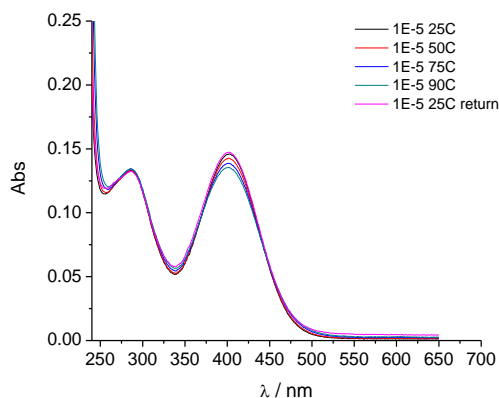

b)

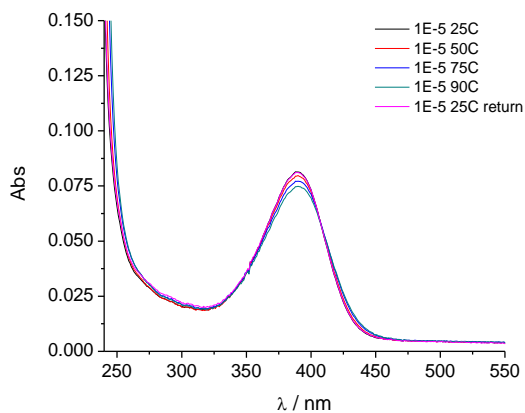

c)

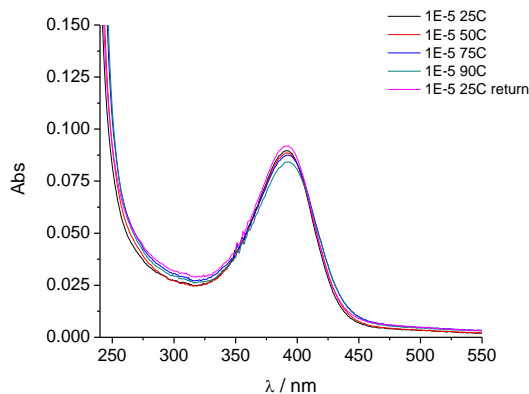

d)

**Figure S2.** a) dependence of UV/Vis spectra of **1** ( $c = 1 \times 10^{-5}$  M) on temperature increase, b) dependence of UV/Vis spectra of **2** ( $c = 1 \times 10^{-5}$  M) on temperature increase, c) dependence

of UV/Vis spectra of **3** ( $c = 1 \times 10^{-5}$  M) on temperature increase, d) dependence of UV/Vis spectra of **4** ( $c = 1 \times 10^{-5}$  M) on temperature increase.

## 2. Interactions with ds-DNA/RNA

### 2.1. UV/Vis titrations

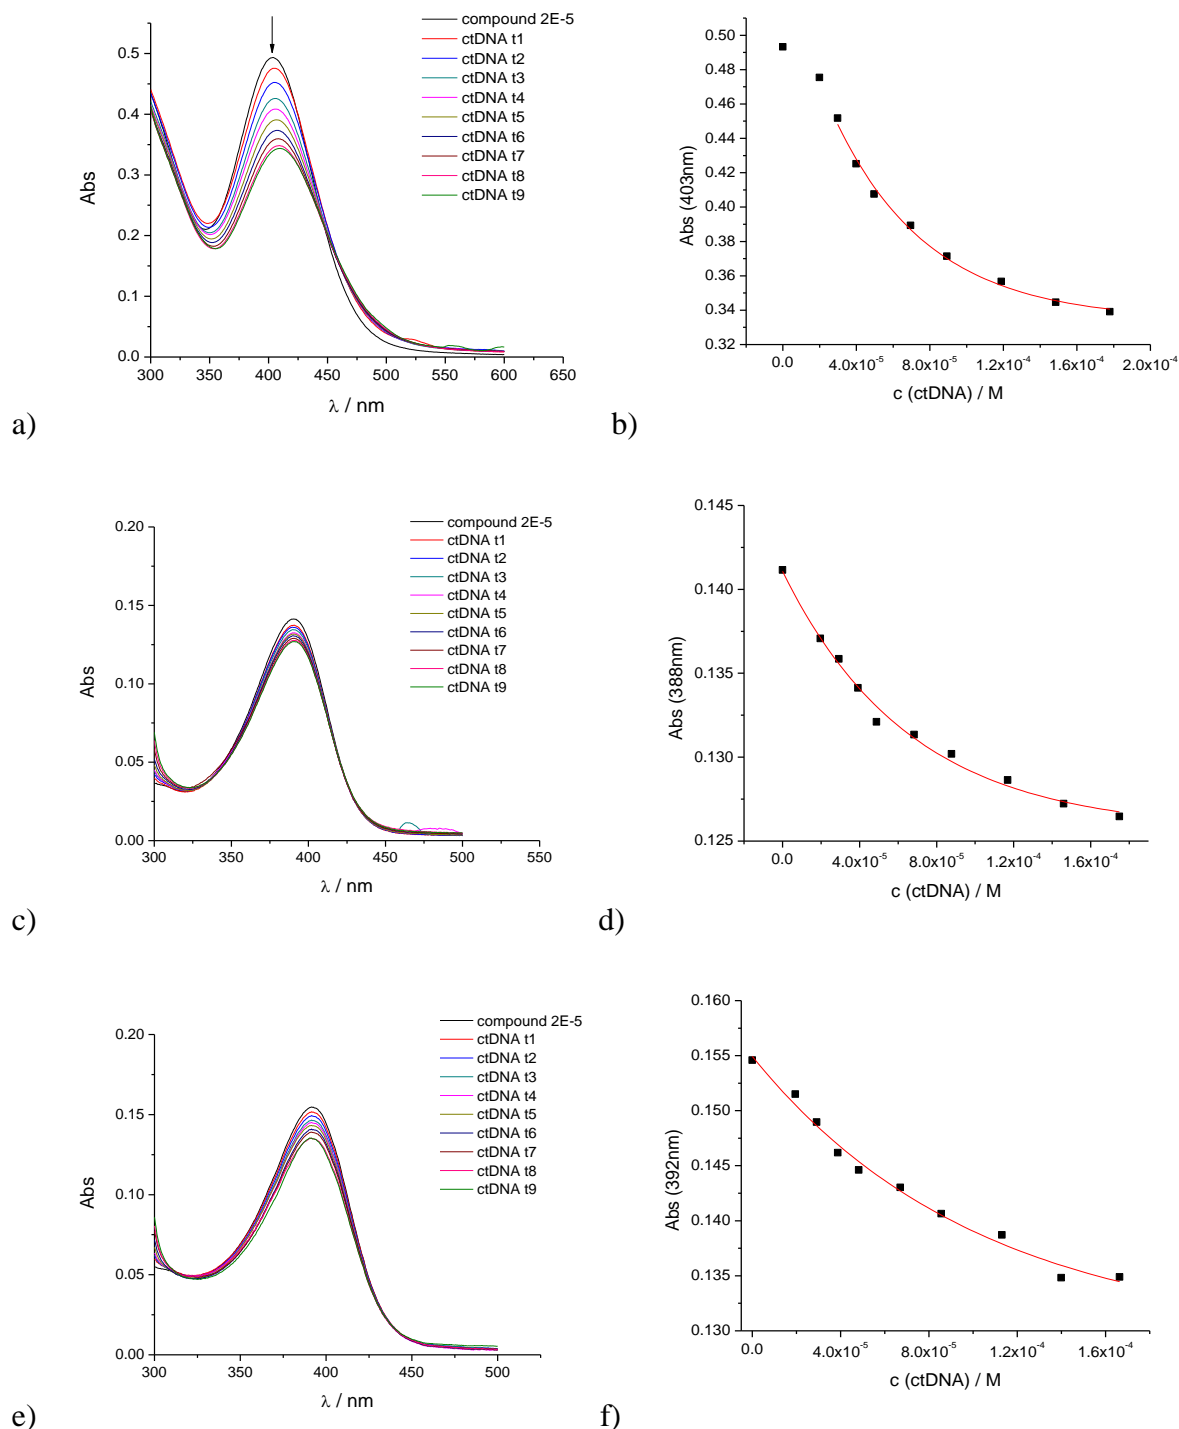

**Figure S3.** a) UV/Vis spectra of **1** ( $c = 2 \times 10^{-5}$  M) upon titration with ct-DNA, b) dependence of **1** absorbance at  $\lambda_{\max} = 403$  nm on  $c$ (pApU), c) UV/Vis spectra of **3** ( $c = 2 \times 10^{-5}$  M) upon titration with ct-DNA, d) dependence of **3** absorbance at  $\lambda_{\max} = 388$  nm on  $c$ (pApU), e) UV/Vis spectra of **4** ( $c = 2 \times 10^{-5}$  M) upon titration with ct-DNA, f) dependence of **4** absorbance at  $\lambda_{\max} = 392$  nm on  $c$ (pApU).

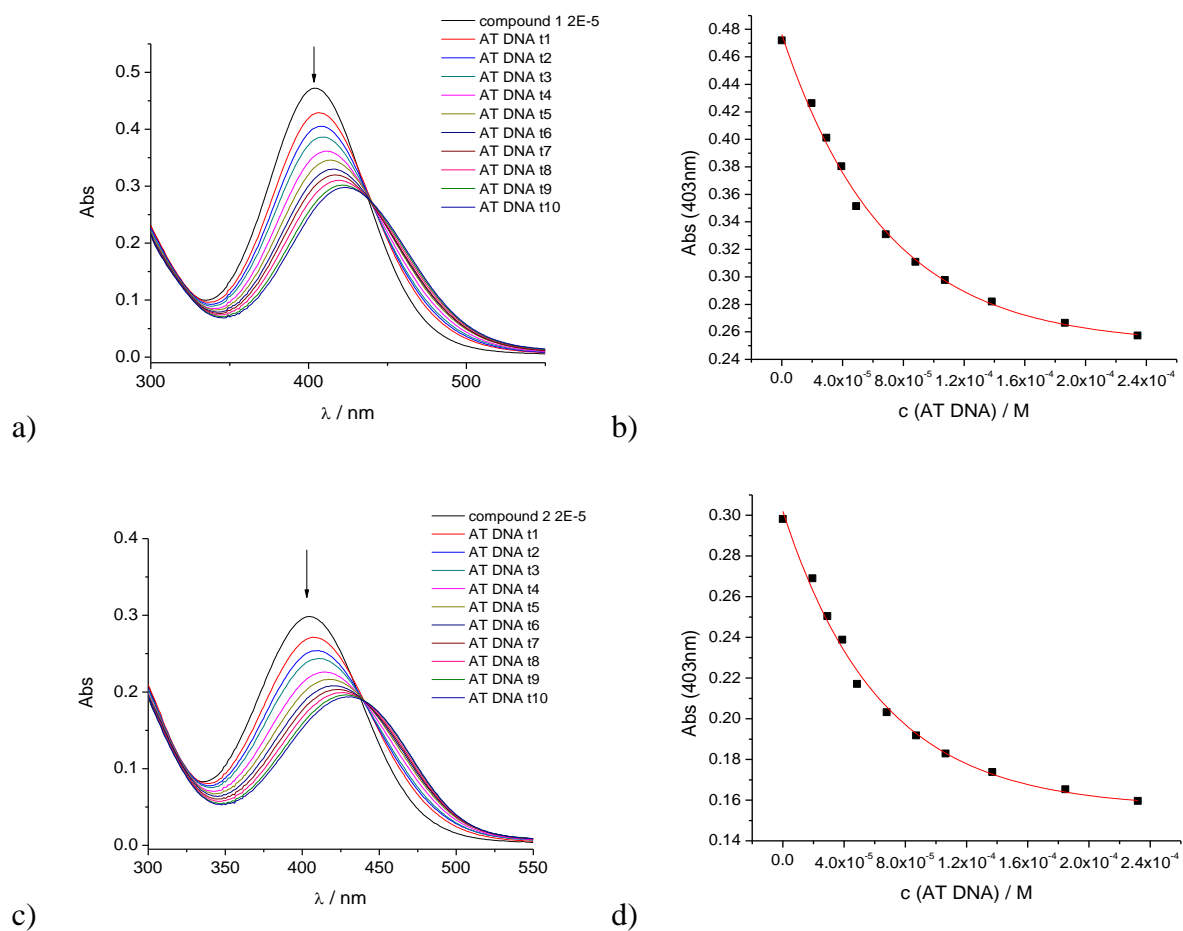

**Figure S4.** ) UV/Vis spectra of 1 ( $c = 2 \times 10^{-5}$  M) upon titration with AT DNA, b) dependence of 1 absorbance at  $\lambda_{max} = 403$  nm on  $c(\text{AT DNA})$ , c) UV/Vis spectra of 2 ( $c = 2 \times 10^{-5}$  M) upon titration with AT DNA, d) dependence of 2 absorbance at  $\lambda_{max} = 403$  nm on  $c(\text{AT DNA})$ .

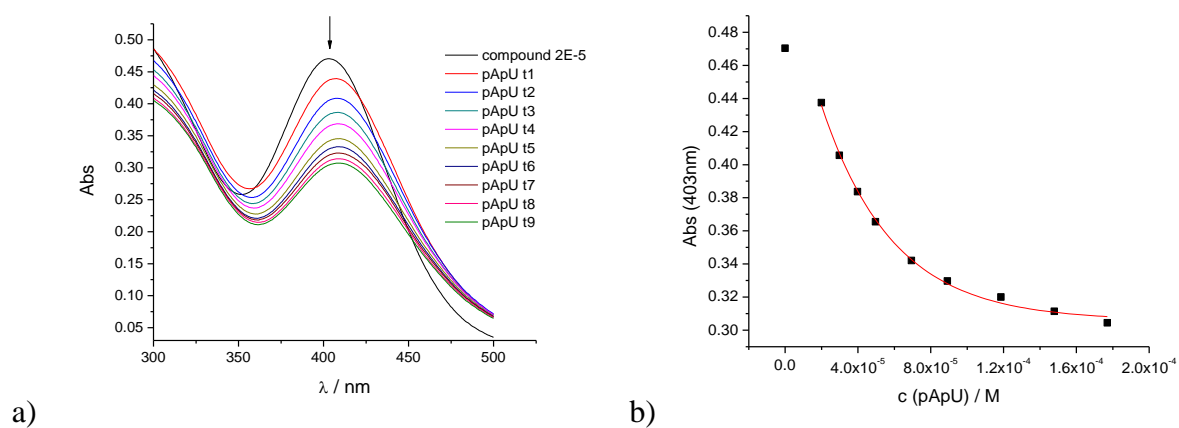

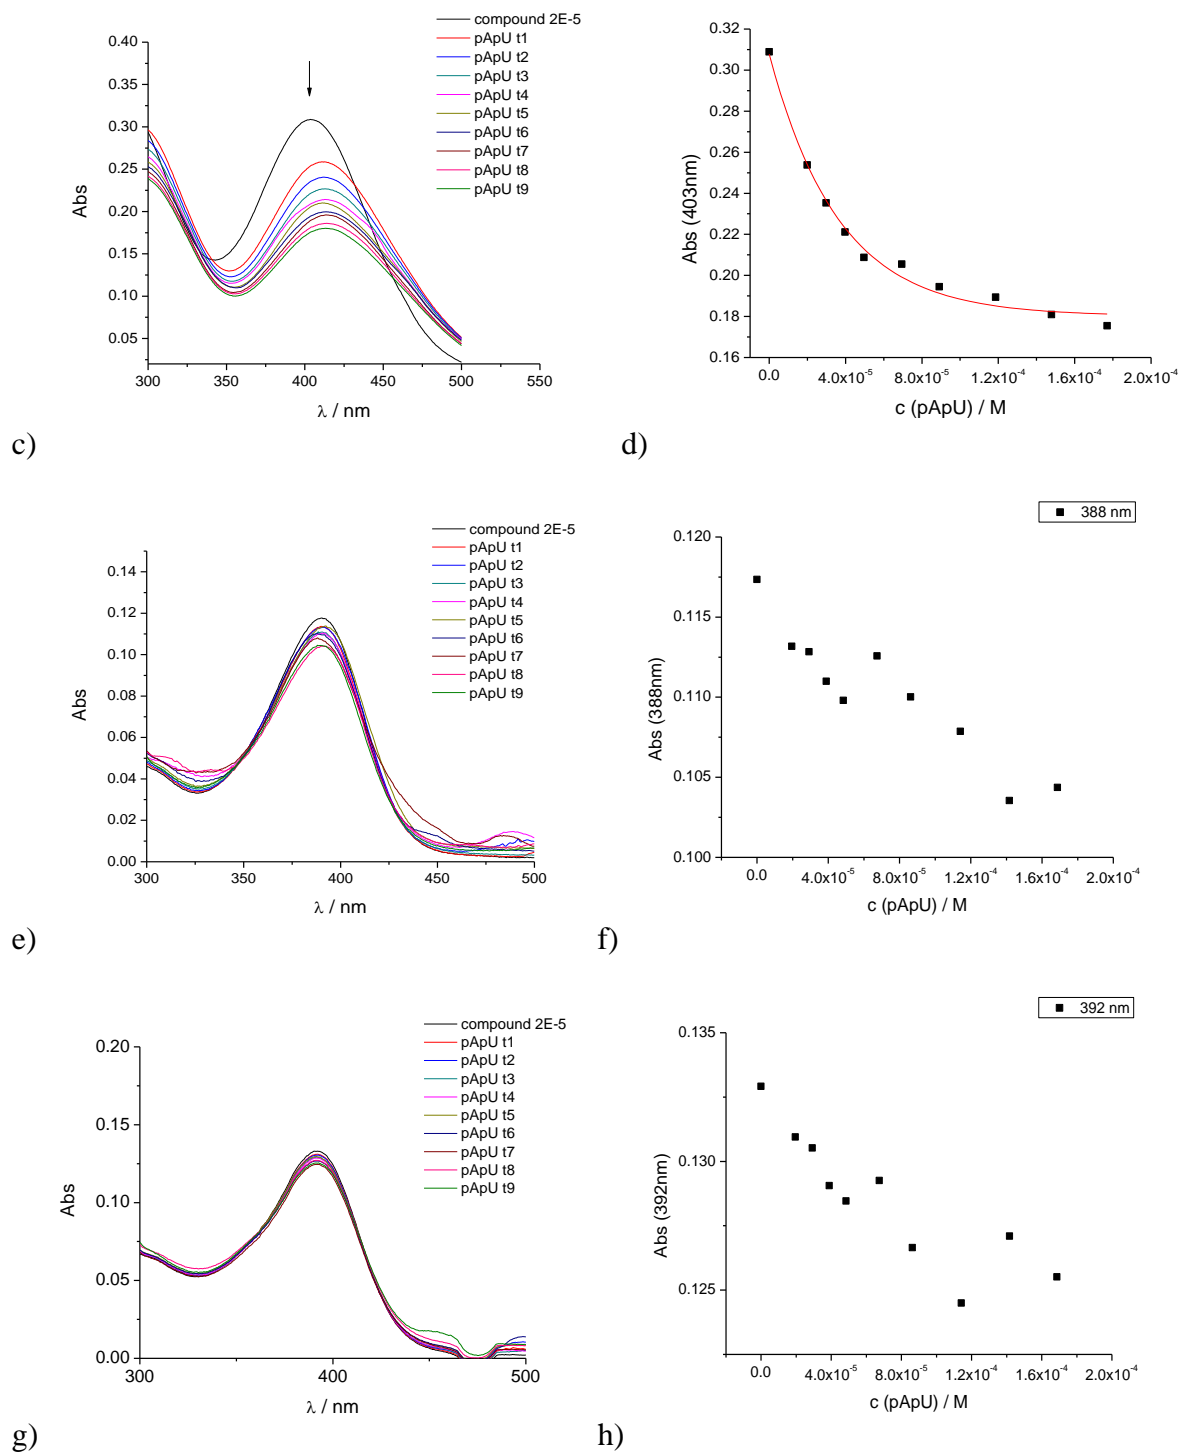

**Figure S5.** a) UV/Vis spectra of **1** ( $c = 2 \times 10^{-5}$  M) upon titration with pApU, b) dependence of **1** absorbance at  $\lambda_{\max} = 403$  nm on  $c(\text{pApU})$ , c) UV/Vis spectra of **2** ( $c = 2 \times 10^{-5}$  M) upon titration with pApU, d) dependence of **2** absorbance at  $\lambda_{\max} = 403$  nm on  $c(\text{pApU})$ , e) UV/Vis spectra of **3** ( $c = 2 \times 10^{-5}$  M) upon titration with pApU, f) dependence of **3** absorbance at  $\lambda_{\max} = 388$  nm on  $c(\text{pApU})$ , h) UV/Vis spectra of **4** ( $c = 2 \times 10^{-5}$  M) upon titration with pApU, g) dependence of **4** absorbance at  $\lambda_{\max} = 392$  nm on  $c(\text{pApU})$ , Done at pH = 7, sodium cacodylate buffer, I = 0.05 M.

## 2.2. Circular dichroism experiments

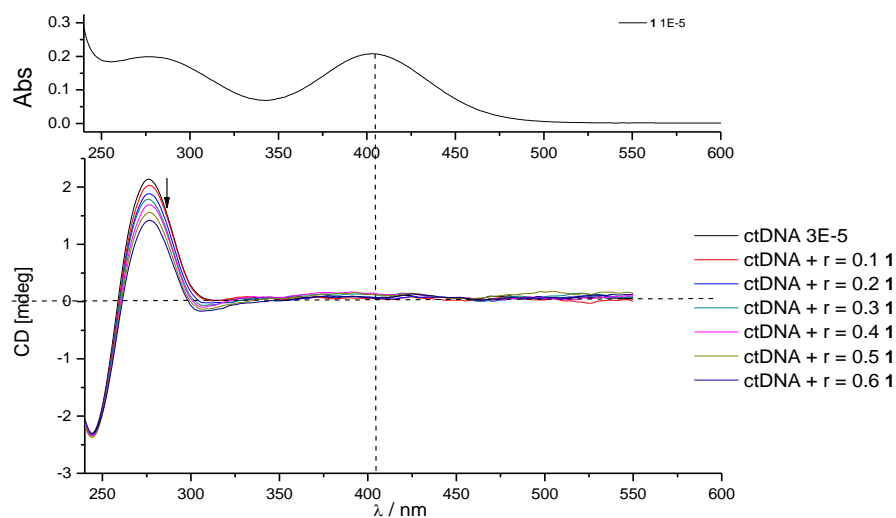

**Figure S6.** CD titration of ctDNA ( $c = 3 \times 10^{-5}$  M) with **1** at molar ratios  $r = [\text{compound}] / [\text{ctDNA}]$  (pH 7.0, buffer sodium cacodylate,  $I = 0.05$  M).

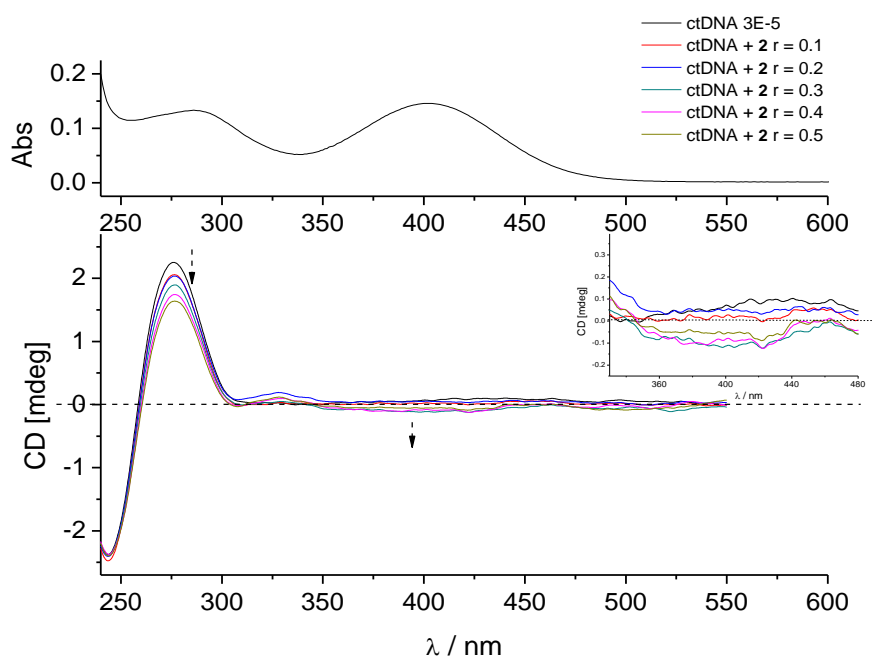

**Figure S7.** CD titration of ctDNA ( $c = 3 \times 10^{-5}$  M) with **2** at molar ratios  $r = [\text{compound}] / [\text{ctDNA}]$  (pH 7.0, buffer sodium cacodylate,  $I = 0.05$  M), inset: ICD at  $\lambda = 410$  nm.



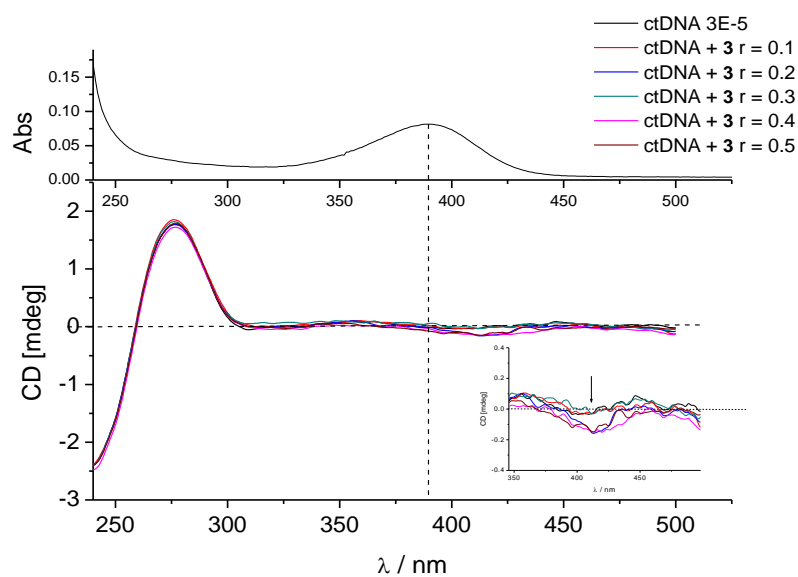

**Figure S8.** CD titration of ctDNA ( $c = 3 \times 10^{-5}$  M) with **3** at molar ratios  $r = [\text{compound}] / [\text{ctDNA}]$  (pH 7.0, buffer sodium cacodylate,  $I = 0.05$  M), inset: ICD at  $\lambda = 414$  nm.

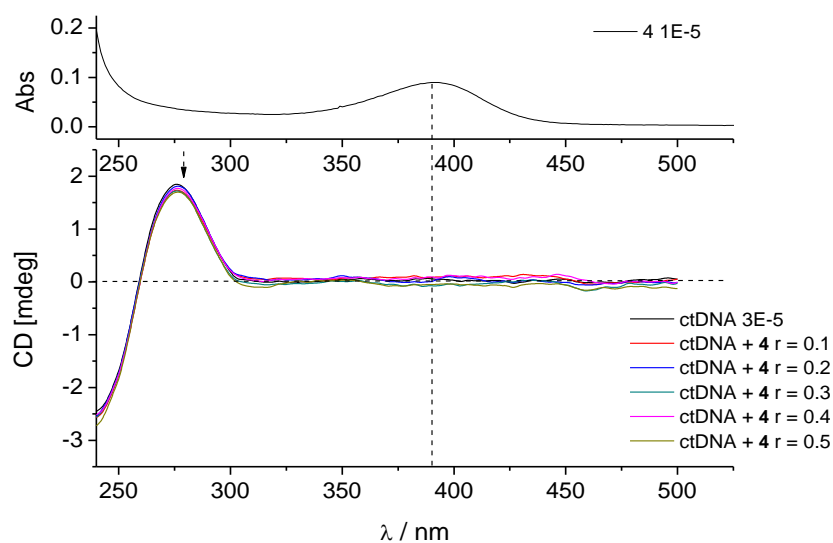

**Figure S9.** CD titration of ctDNA ( $c = 3 \times 10^{-5}$  M) with **4** at molar ratios  $r = [\text{compound}] / [\text{ctDNA}]$  (pH 7.0, buffer sodium cacodylate,  $I = 0.05$  M).

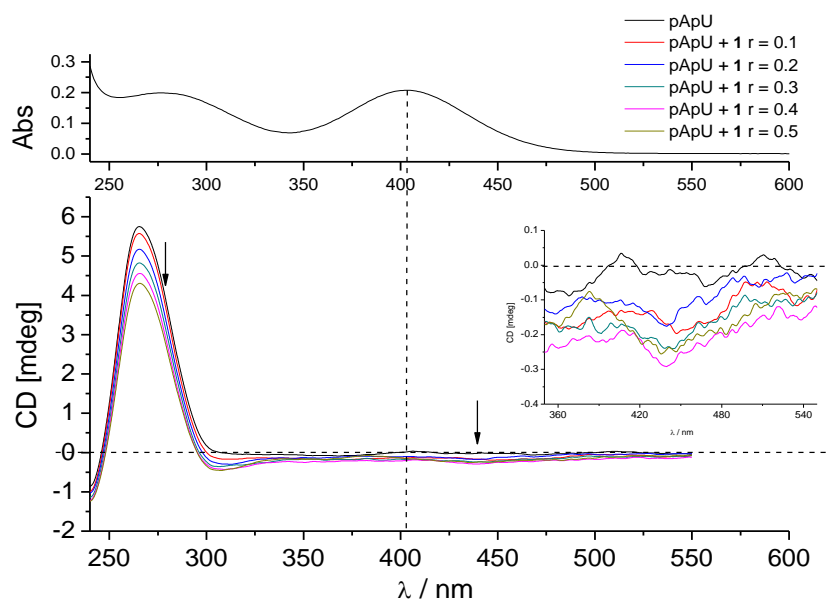

**Figure S10.** CD titration of pApU ( $c = 3 \times 10^5$  M) with **1** at molar ratios  $r = [\text{compound}] / [\text{pApU}]$  (pH 7.0, buffer sodium cacodylate,  $I = 0.05$  M), inset: ICD at  $\lambda = 440$  nm.

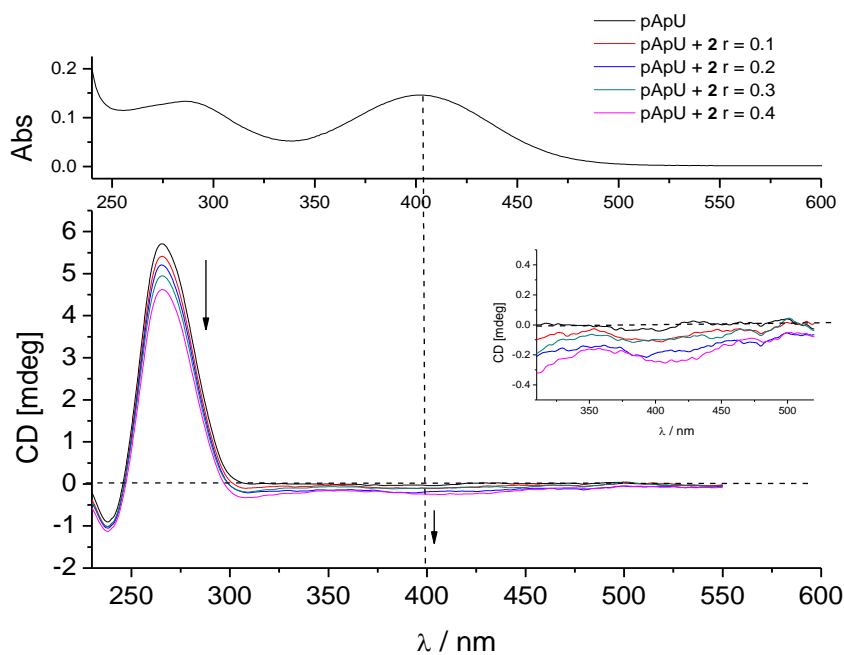

**Figure S11.** CD titration of pApU ( $c = 3 \times 10^5$  M) with **2** at molar ratios  $r = [\text{compound}] / [\text{pApU}]$  (pH 7.0, buffer sodium cacodylate,  $I = 0.05$  M), inset: ICD at  $\lambda = 410$  nm.

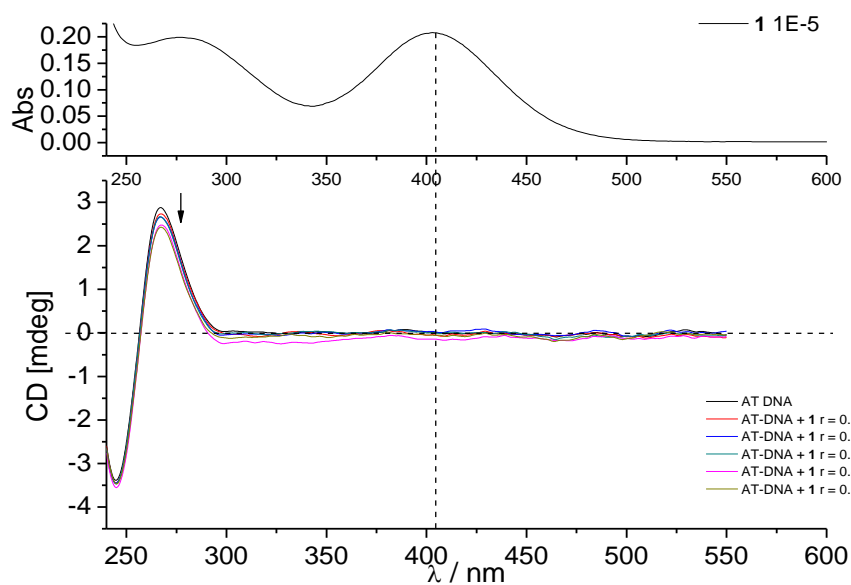

**Figure S12.** CD titration of AT-DNA ( $c = 3 \times 10^{-5}$  M) with **1** at molar ratios  $r = [\text{compound}] / [\text{AT-DNA}]$  (pH 7.0, buffer sodium cacodylate,  $I = 0.05$  M).

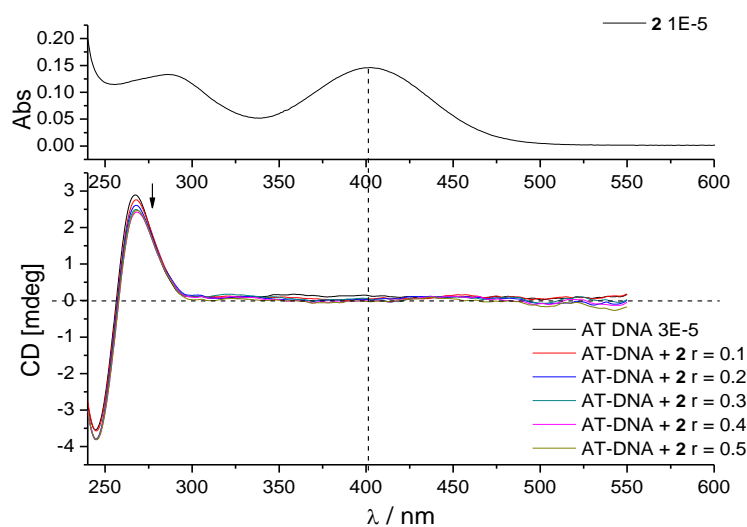

**Figure S13.** CD titration of AT-DNA ( $c = 3 \times 10^{-5}$  M) with **2** at molar ratios  $r = [\text{compound}] / [\text{AT-DNA}]$  (pH 7.0, buffer sodium cacodylate,  $I = 0.05$  M).

## 2.3. Thermal denaturation measurements

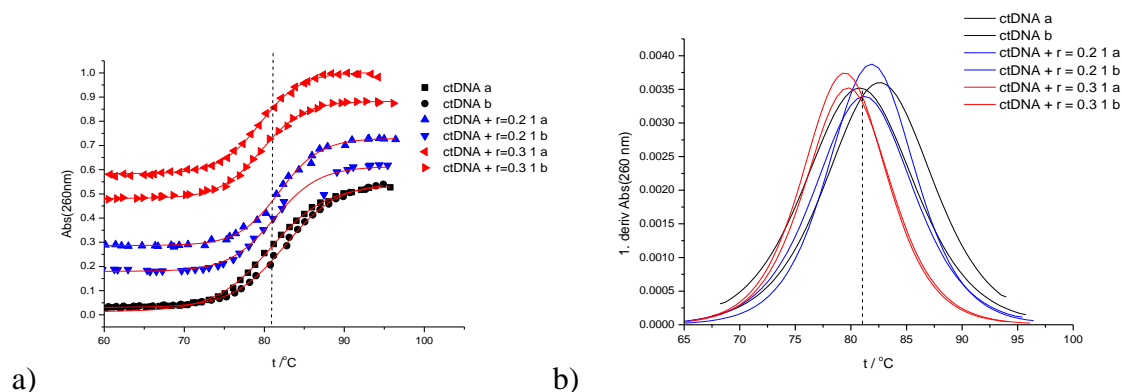

**Figure S14.** a) Melting curves of ct-DNA upon addition  $r = 0.2$  or  $r = 0.3$  ([compound]/[polynucleotide]) of **1** at pH 7.0, (buffer sodium cacodylate,  $I = 0.05$  M), red lines denote fitting of experimental data to sigmoidal eq. by Origin 7.5., b) the first derivation of absorbance (fitted to sigmoidal eq.) on temperature. Absorbance values are normalized by maximum absorbance and offset for better visualization of data.

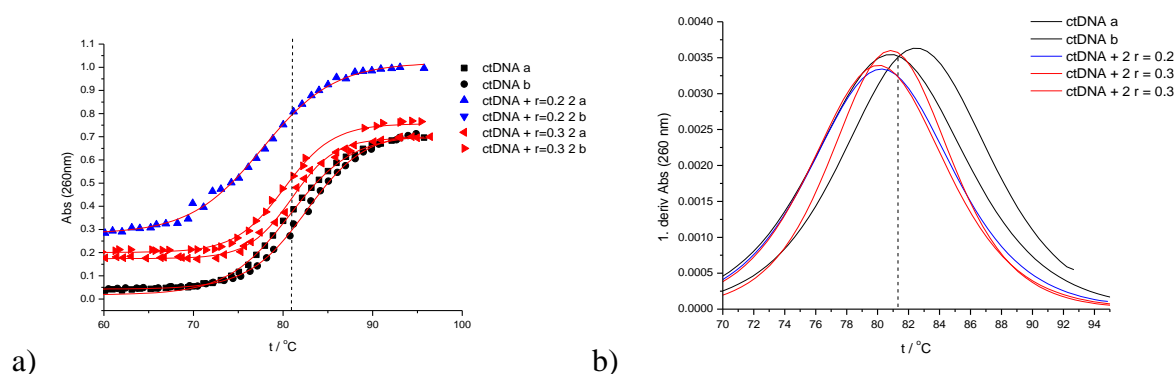

**Figure S15.** a) Melting curves of ctDNA upon addition  $r = 0.3$  or  $r = 0.2$  ([compound]/[polynucleotide]) of **2** at pH 7.0, (buffer sodium cacodylate,  $I = 0.05$  M), red lines denote fitting of experimental data to sigmoidal eq. by Origin 7.5., b) the first derivation of absorbance (fitted to sigmoidal eq.) on temperature. Absorbance values are normalized by maximum absorbance and offset for better visualization of data.

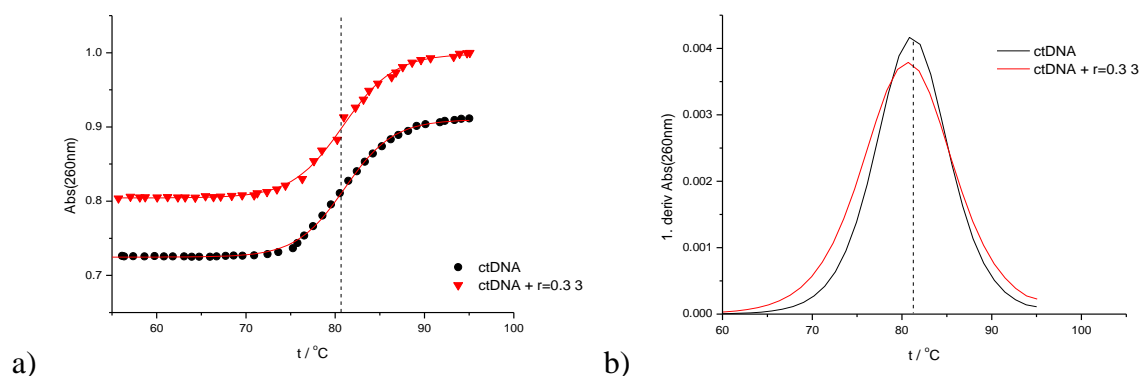

**Figure S16.** a) Melting curves of ct-DNA upon addition  $r = 0.3$  ([compound]/[polynucleotide]) of **3** at pH 7.0, (buffer sodium cacodylate,  $I = 0.05$  M), red lines denote fitting of experimental

data to sigmoidal eq. by Origin 7.5, b) the first derivation of absorbance (fitted to sigmoidal eq.) on temperature. Absorbance values are normalized by maximum absorbance and offset for better visualization of data.

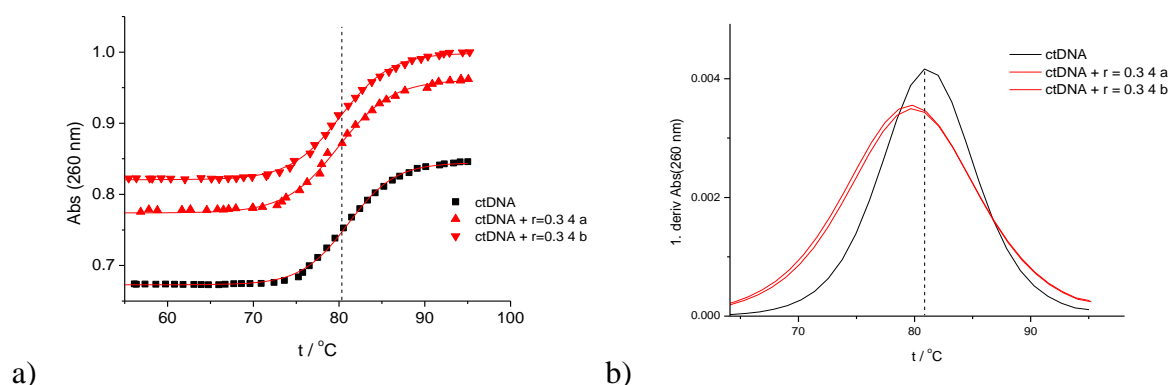

**Figure S17.** a) Melting curves of ct-DNA upon addition  $r = 0.3$  ([compound]/[polynucleotide]) of **4** at pH 7.0, (buffer sodium cacodylate,  $I = 0.05$  M), red lines denote fitting of experimental data to sigmoidal eq. by Origin 7.5, b) the first derivation of absorbance (fitted to sigmoidal eq.) on temperature. Absorbance values are normalized by maximum absorbance and offset for better visualization of data.

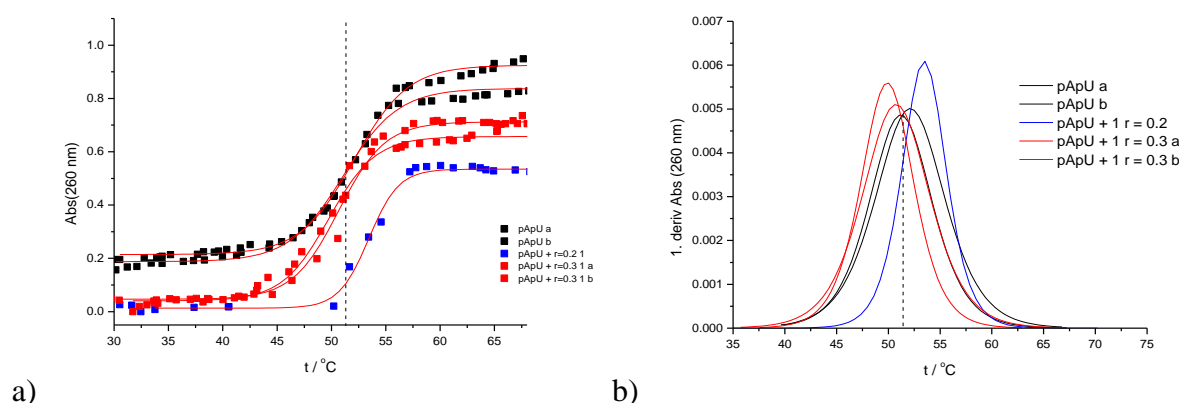

**Figure S18.** a) Melting curves of pApU upon addition  $r = 0.2$  or  $r = 0.3$  ([compound]/[polynucleotide]) of **1** at pH 7.0, (buffer sodium cacodylate,  $I = 0.05$  M), red lines denote fitting of experimental data to sigmoidal eq. by Origin 7.5., b) the first derivation of absorbance (fitted to sigmoidal eq.) on temperature. Absorbance values are normalized by maximum absorbance and offset for better visualization of data.

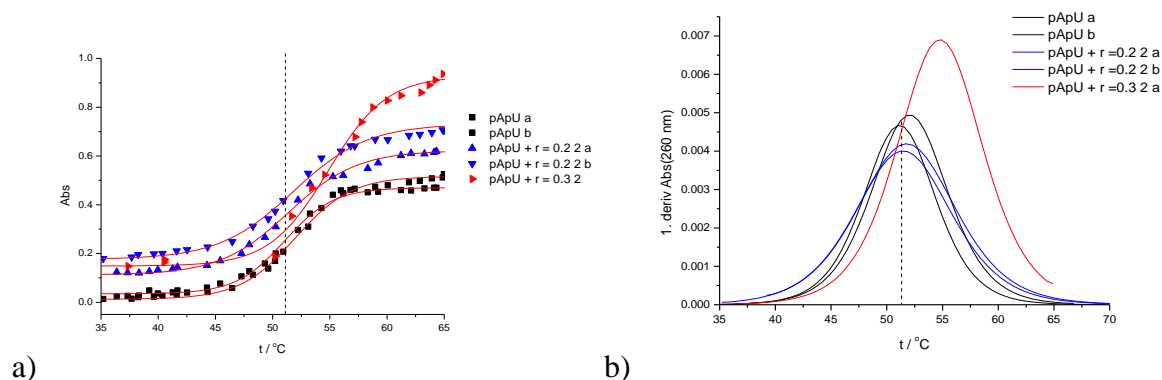

**Figure S19.** a) Melting curves of pApU upon addition  $r = 0.2$  or  $r = 0.3$  p([compound]/[polynucleotide]) of **2** at pH 7.0, (buffer sodium cacodylate,  $I = 0.05$  M), red lines denote fitting of experimental data to sigmoidal eq. by Origin 7.5., b) the first derivation of absorbance (fitted to sigmoidal eq.) on temperature. Absorbance values are normalized by maximum absorbance and offset for better visualization of data.

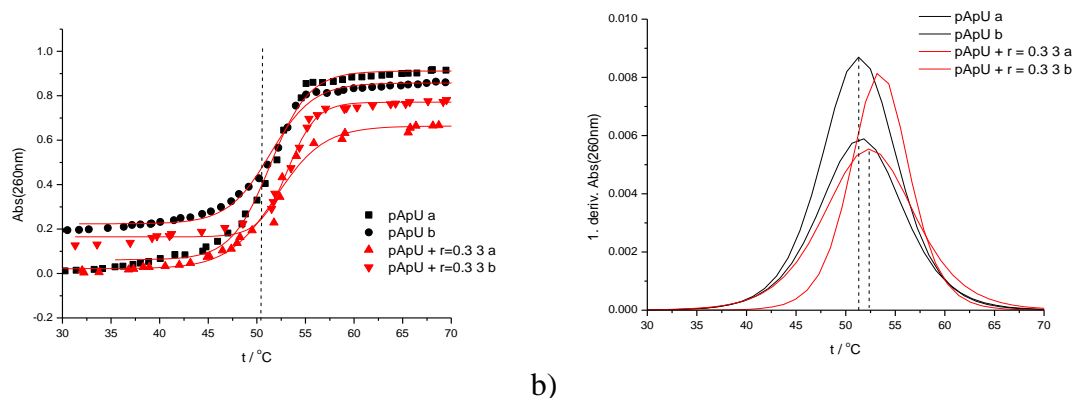

**Figure S20.** a) Melting curves of pApU upon addition  $r = 0.3$  ([compound]/[polynucleotide]) of **3** at pH 7.0, (buffer sodium cacodylate,  $I = 0.05$  M), red lines denote fitting of experimental data to sigmoidal eq. by Origin 7.5, b) the first derivation of absorbance (fitted to sigmoidal eq.) on temperature. Absorbance values are normalized by maximum absorbance and offset for better visualization of data.

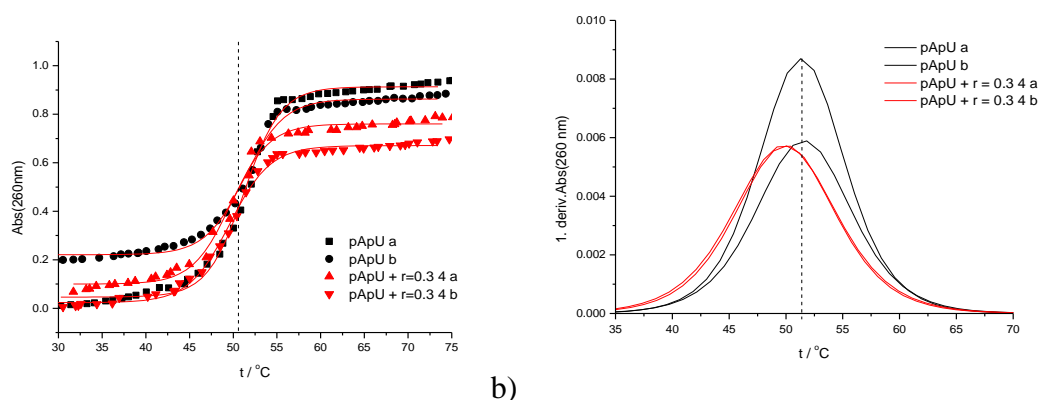

**Figure S21.** Melting curves of pApU upon addition  $r = 0.3$  ([compound]/[polynucleotide]) of **4** at pH 7.0, (buffer sodium cacodylate,  $I = 0.05$  M), red lines denote fitting of experimental data to sigmoidal eq. by Origin 7.5, b) the first derivation of absorbance (fitted to sigmoidal eq.) on temperature. Absorbance values are normalized by maximum absorbance and offset for better visualization of data.

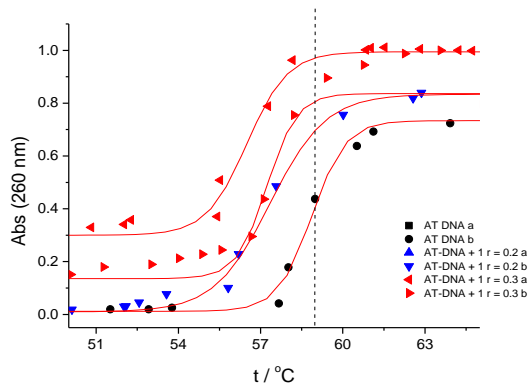

a)

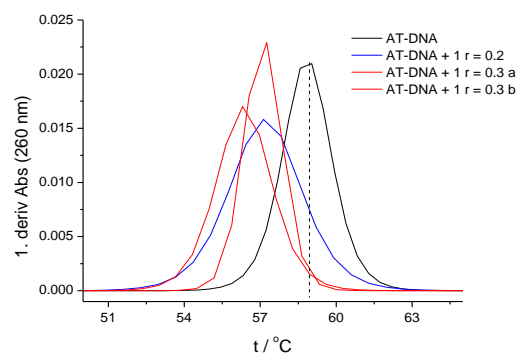

b)

**Figure S22.** a) Melting curves of AT-DNA upon addition  $r = 0.2$  or  $r = 0.3$   $p([compound]/[polynucleotide])$  of **1** at pH 7.0, (buffer sodium cacodylate,  $I = 0.05$  M), red lines denote fitting of experimental data to sigmoidal eq. by Origin 7.5., b) the first derivation of absorbance (fitted to sigmoidal eq.) on temperature. Absorbance values are normalized by maximum absorbance and offset for better visualization of data.

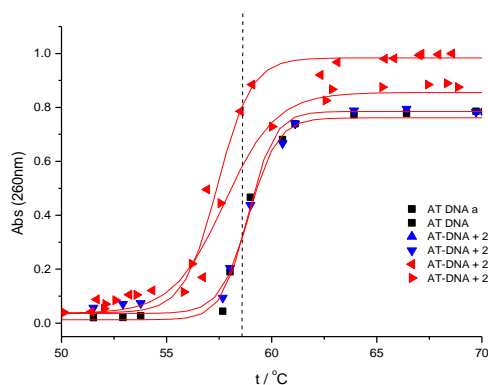

a)

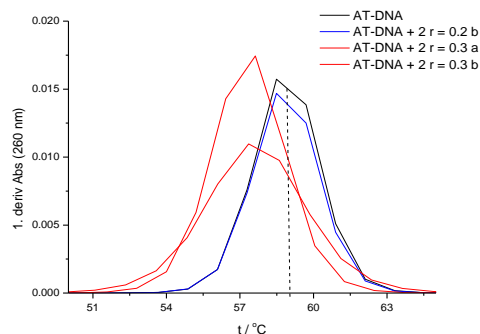

b)

**Figure S23.** a) Melting curves of AT-DNA upon addition  $r = 0.2$  or  $r = 0.3$   $p([compound]/[polynucleotide])$  of **2** at pH 7.0, (buffer sodium cacodylate,  $I = 0.05$  M), red lines denote fitting of experimental data to sigmoidal eq. by Origin 7.5., b) the first derivation of absorbance (fitted to sigmoidal eq.) on temperature. Absorbance values are normalized by maximum absorbance and offset for better visualization of data.

### 3. NMR spectra of benzothiazines

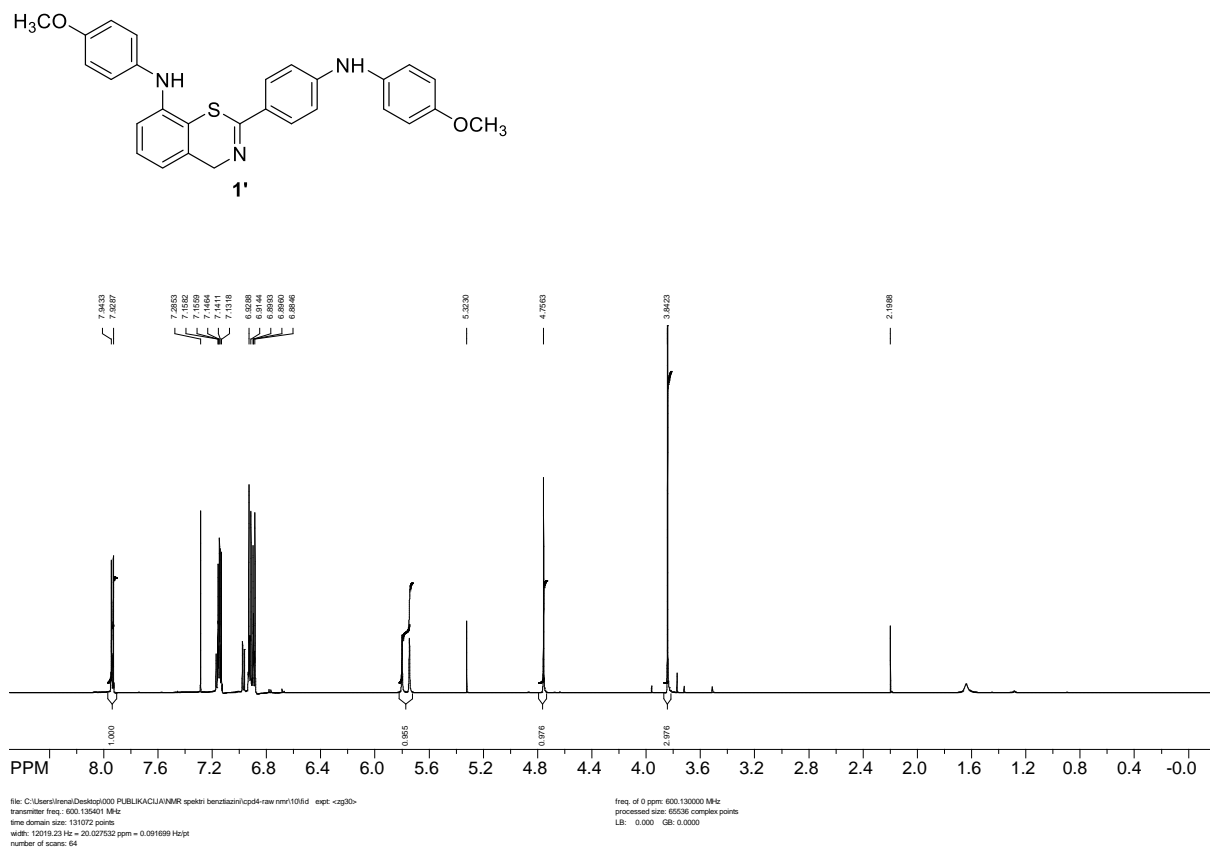

Figure S24. <sup>1</sup>H NMR (CDCl<sub>3</sub>) spectrum of benzothiazine **1'**.

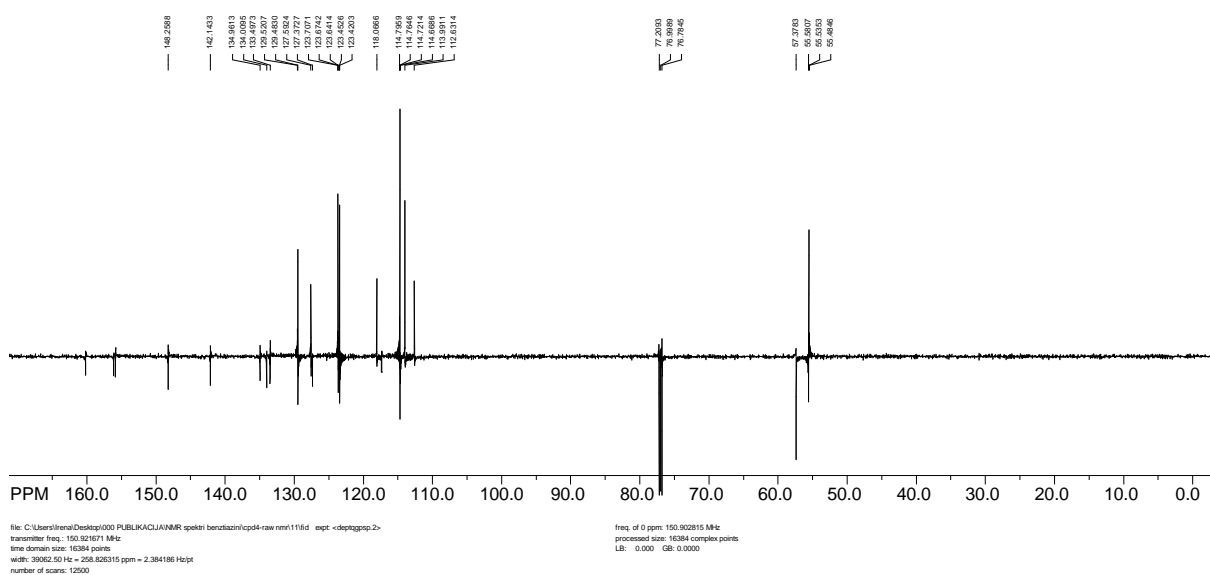

Figure S25. <sup>13</sup>C NMR (CDCl<sub>3</sub>) spectrum of benzothiazine **1'**.



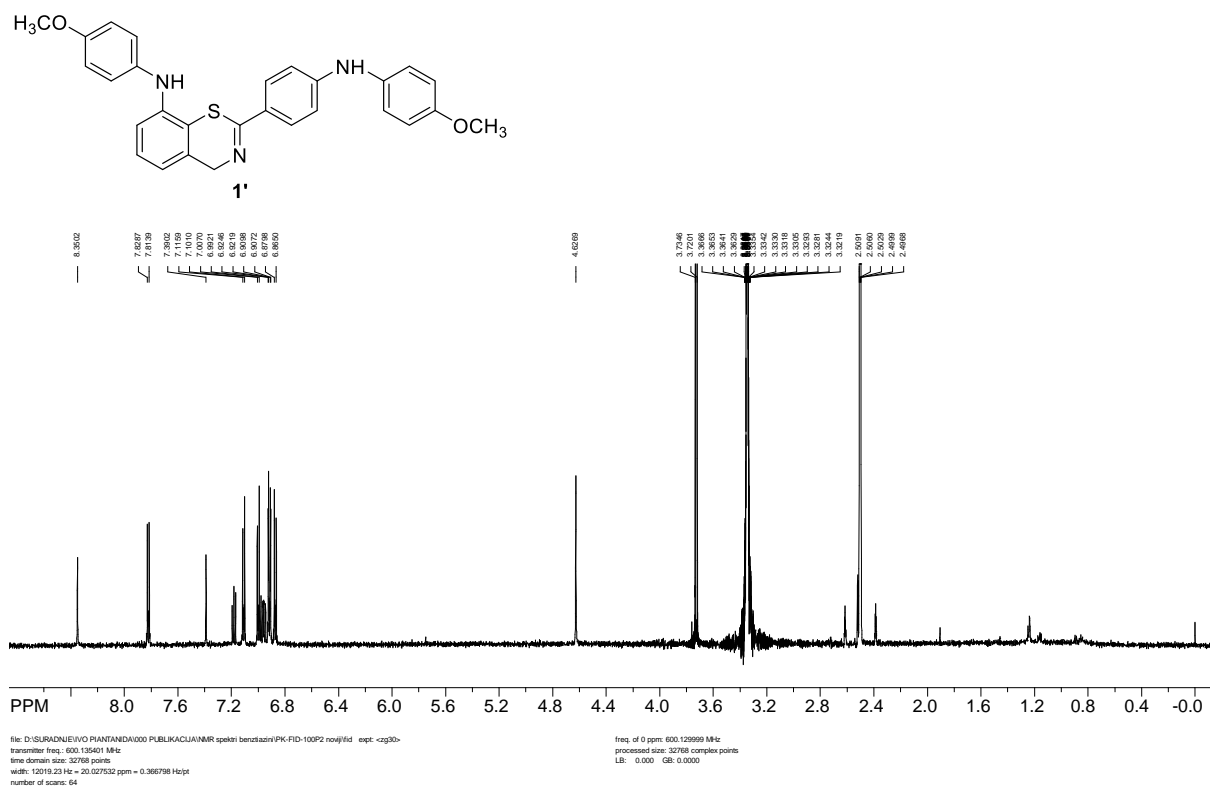

**Figure S26.** <sup>1</sup>H NMR (DMSO) spectrum of benzothiazine **1'**.

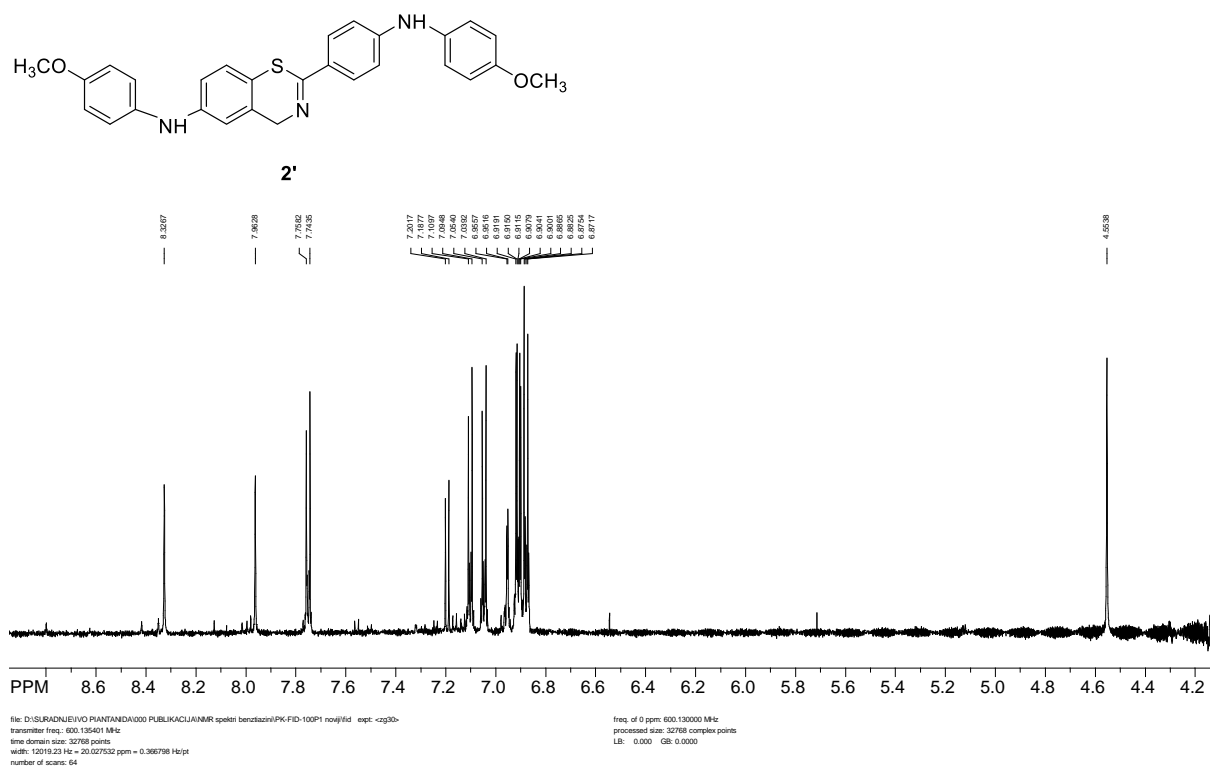

**Figure S27.** <sup>1</sup>H NMR (DMSO) spectrum of benzothiazine **2'**.

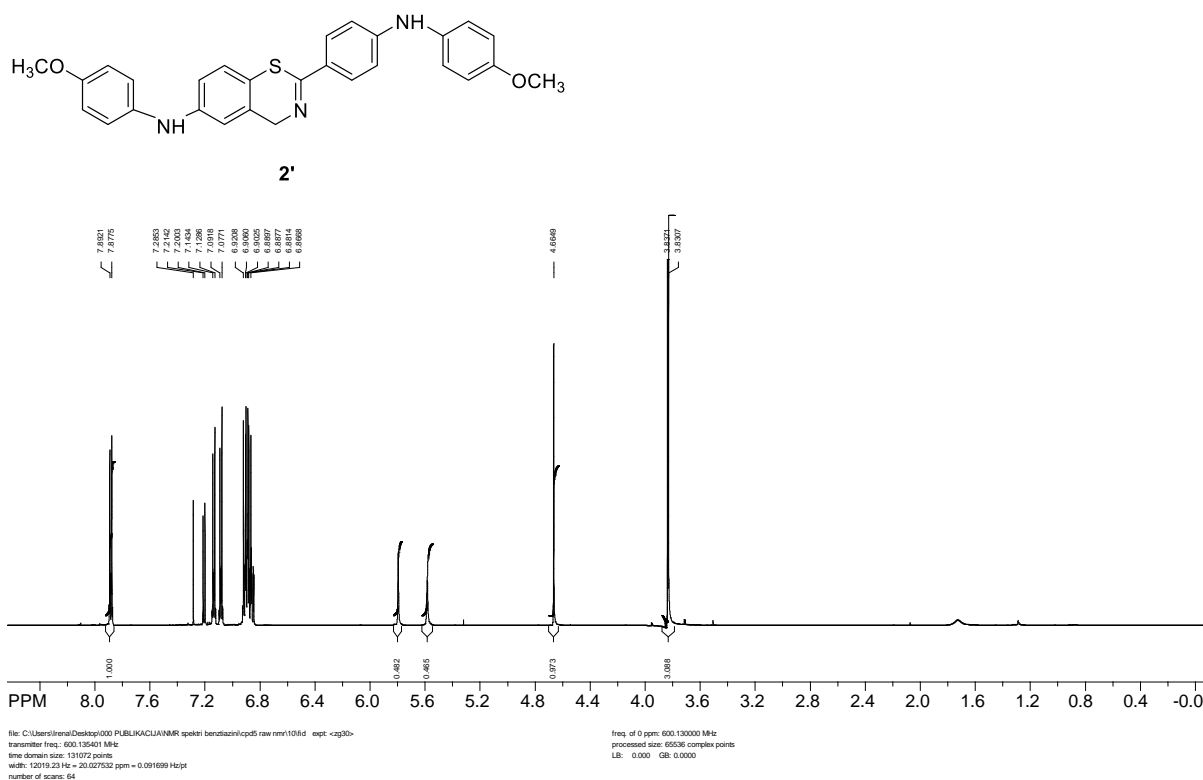

**Figure S28.**  $^1\text{H}$  NMR ( $\text{CDCl}_3$ ) spectrum of benzothiazine **2'**.

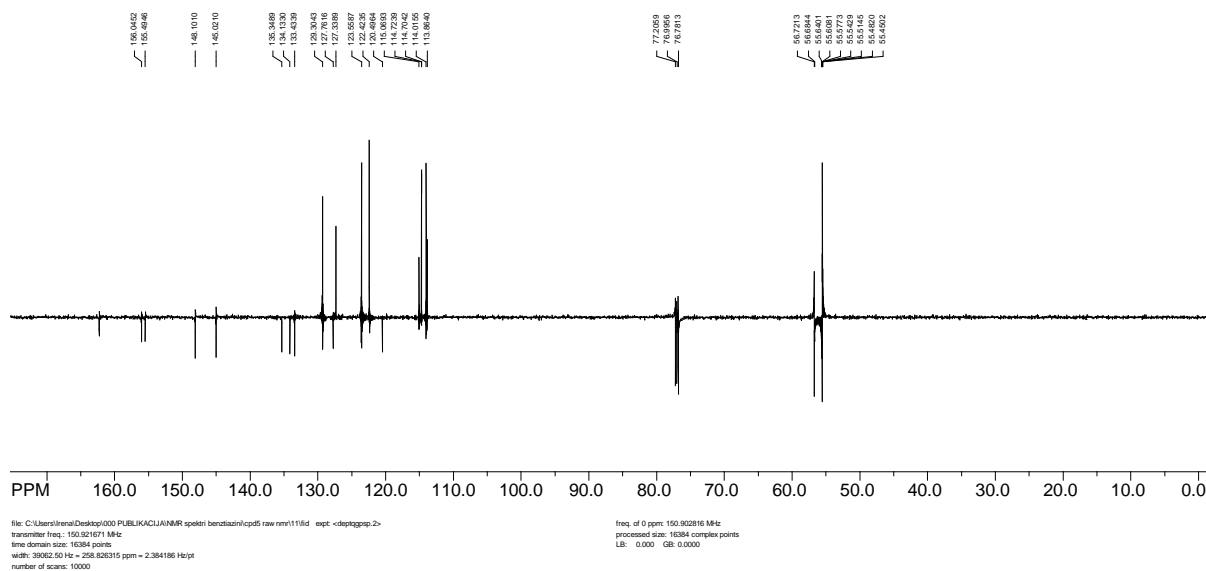

**Figure S29.**  $^{13}\text{C}$  NMR ( $\text{CDCl}_3$ ) spectrum of benzothiazine **2'**.

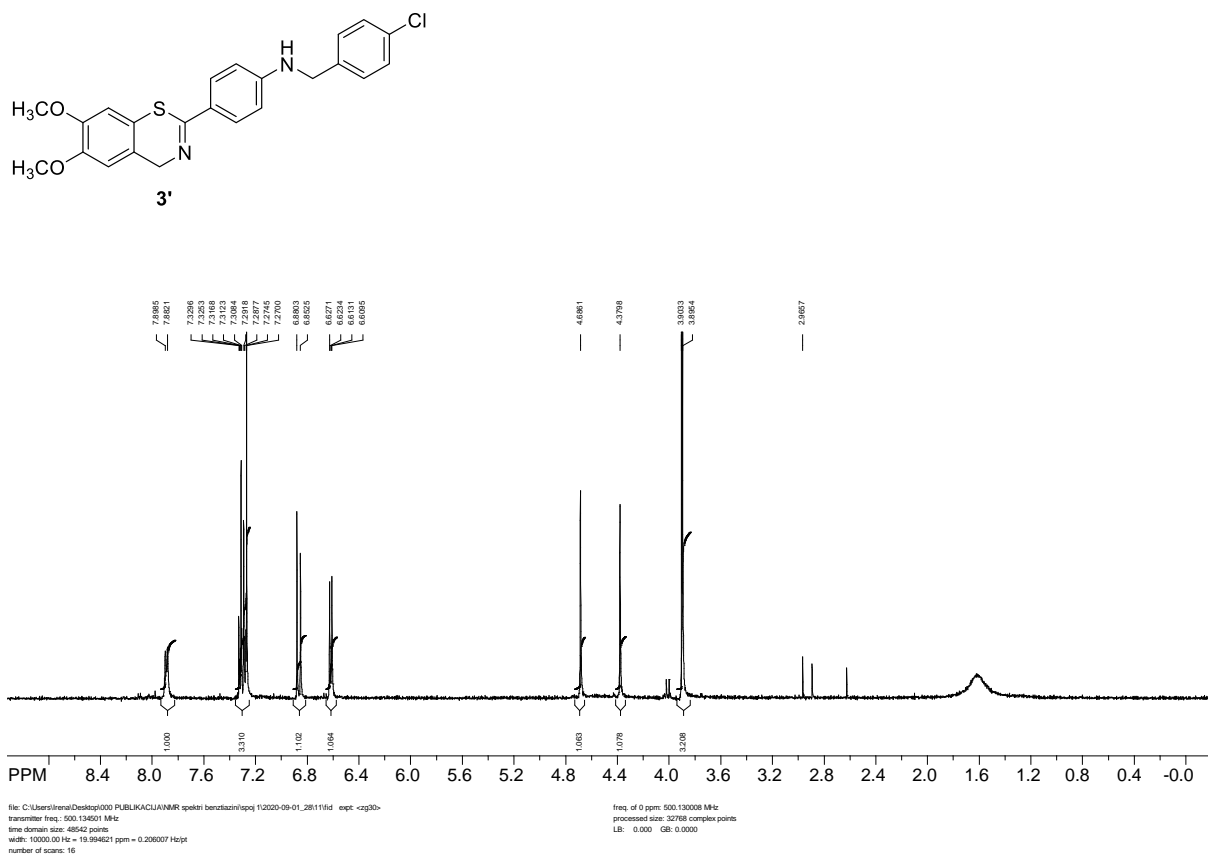

Figure S30. <sup>1</sup>H NMR (CDCl<sub>3</sub>) spectrum of benzothiazine **3'**.

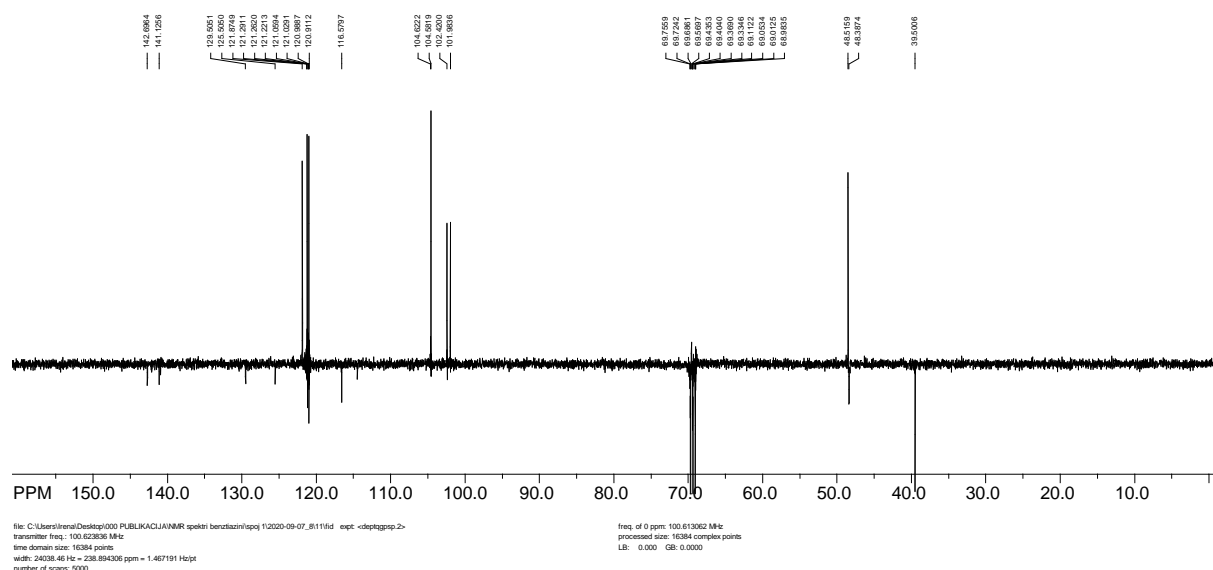

Figure S31. <sup>13</sup>C NMR (CDCl<sub>3</sub>) spectrum of benzothiazine **3'**.

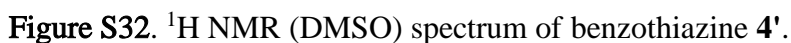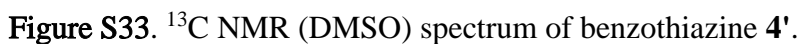

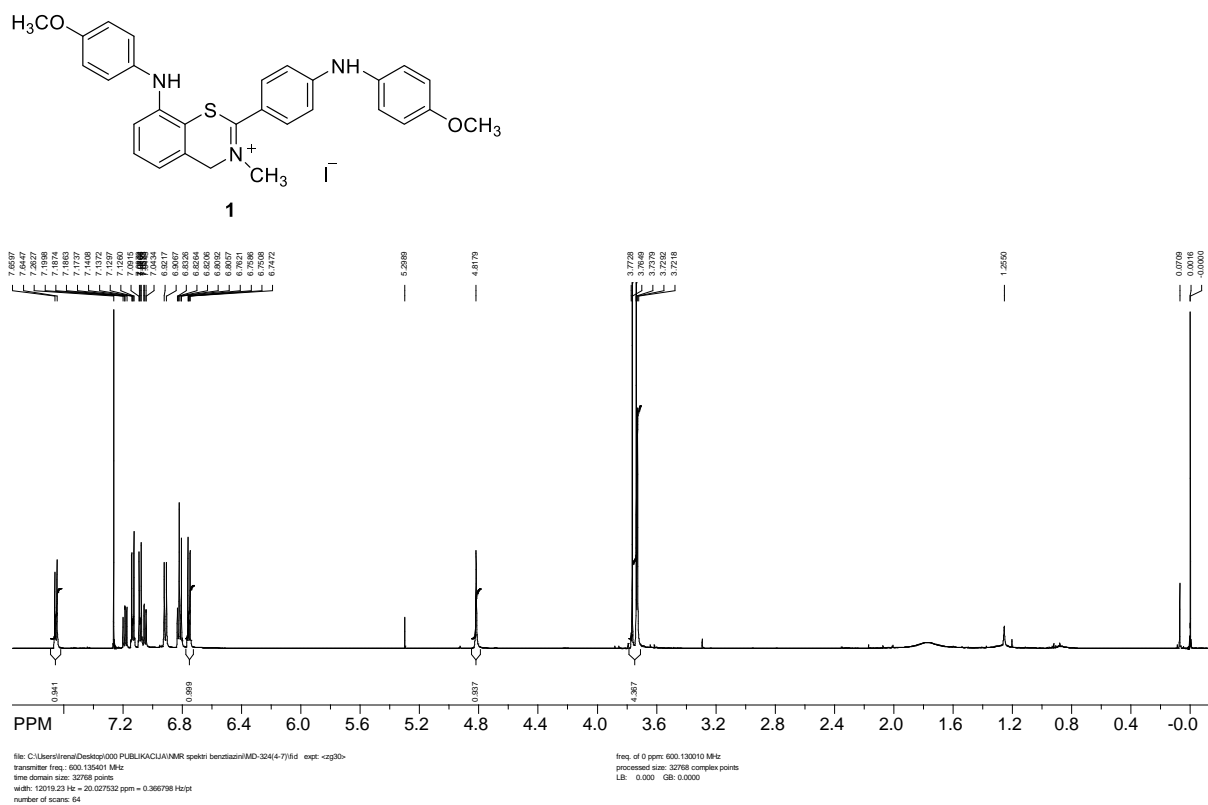

Figure S34. <sup>1</sup>H NMR (CDCl<sub>3</sub>) spectrum of benzothiazine **1**.

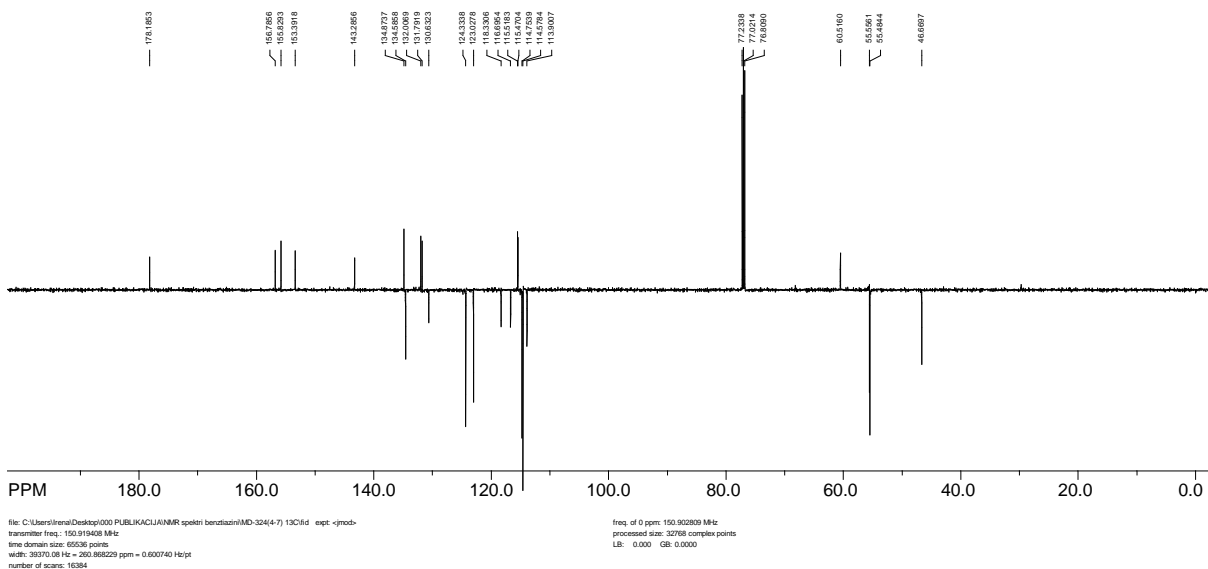

Figure S35. <sup>13</sup>C NMR (CDCl<sub>3</sub>) spectrum of benzothiazine **1**.

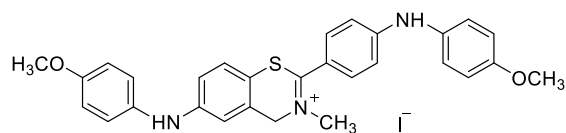

**2**

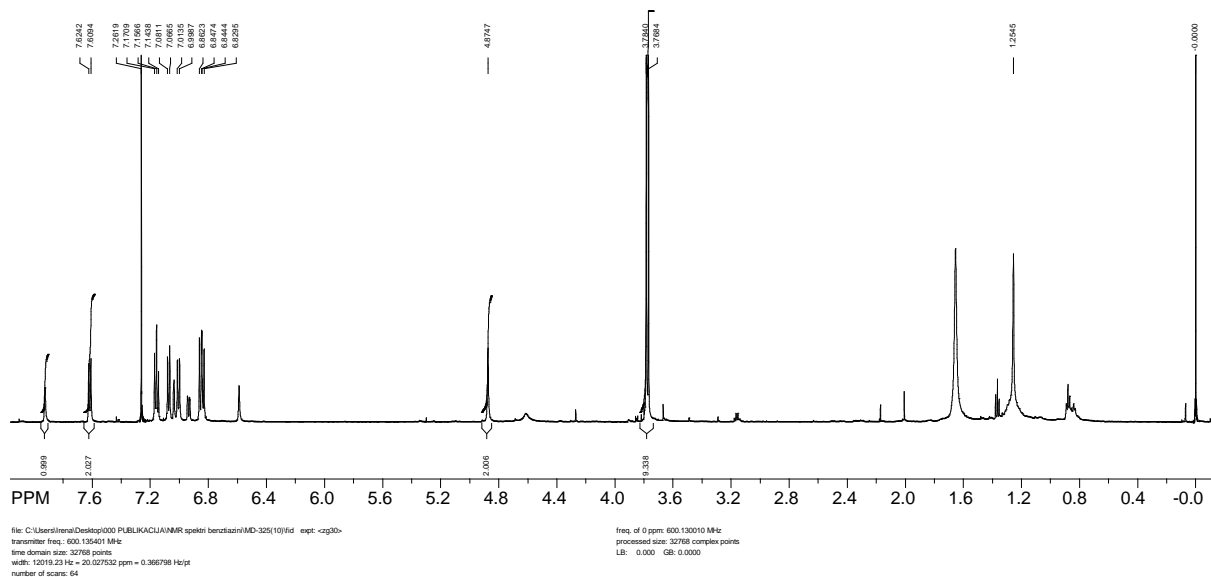

**Figure S36.** <sup>1</sup>H NMR (CDCl<sub>3</sub>) spectrum of benzothiazine **2**.

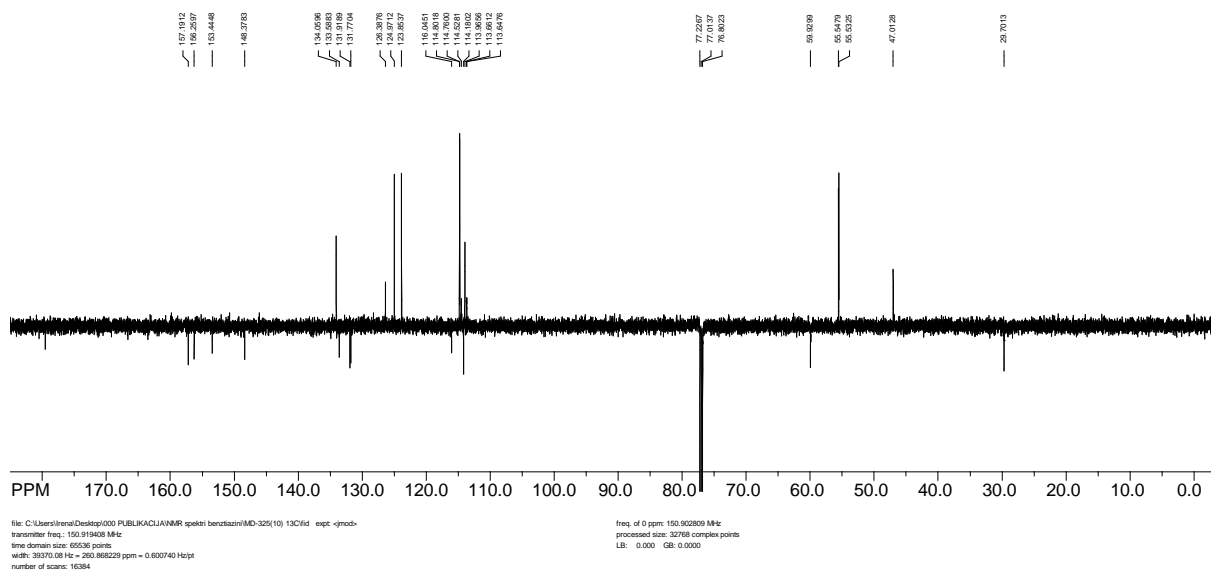

**Figure S37.** <sup>13</sup>C NMR (CDCl<sub>3</sub>) spectrum of benzothiazine **2**.

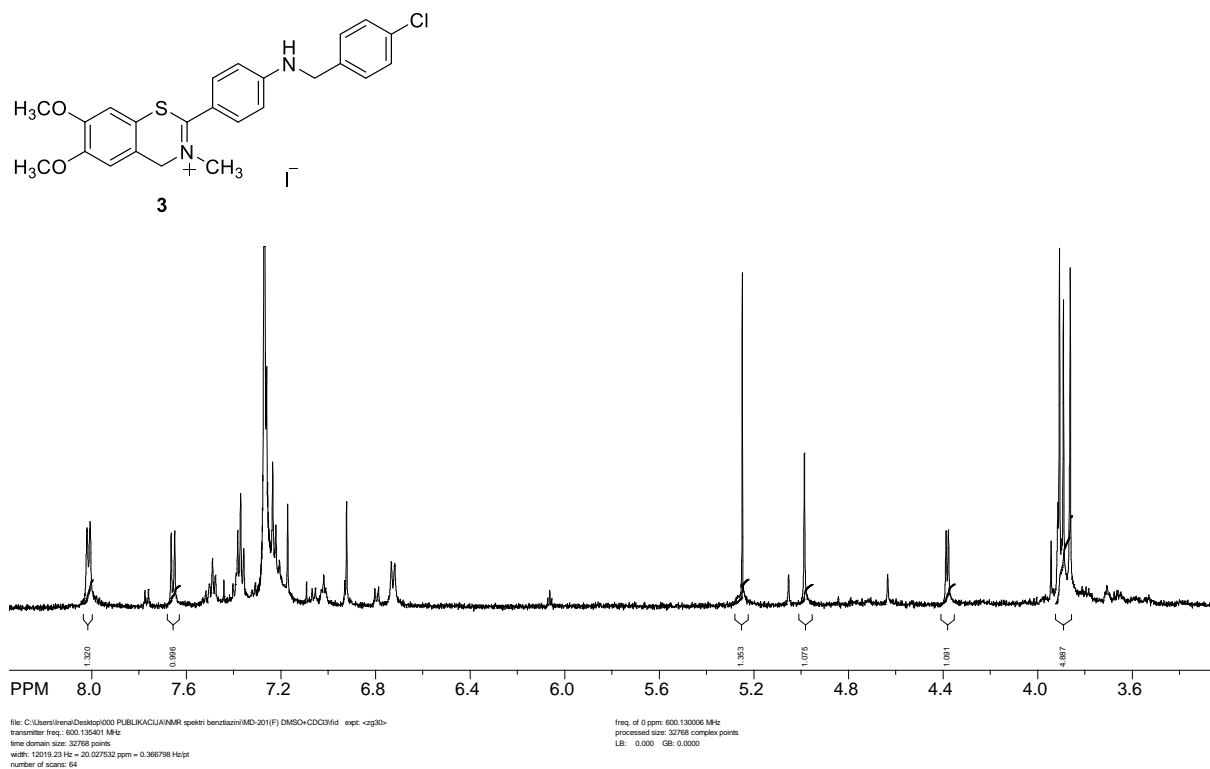

**Figure S38.**  $^1\text{H}$  NMR (CDCl<sub>3</sub> + DMSO) spectrum of benzothiazine **3**.

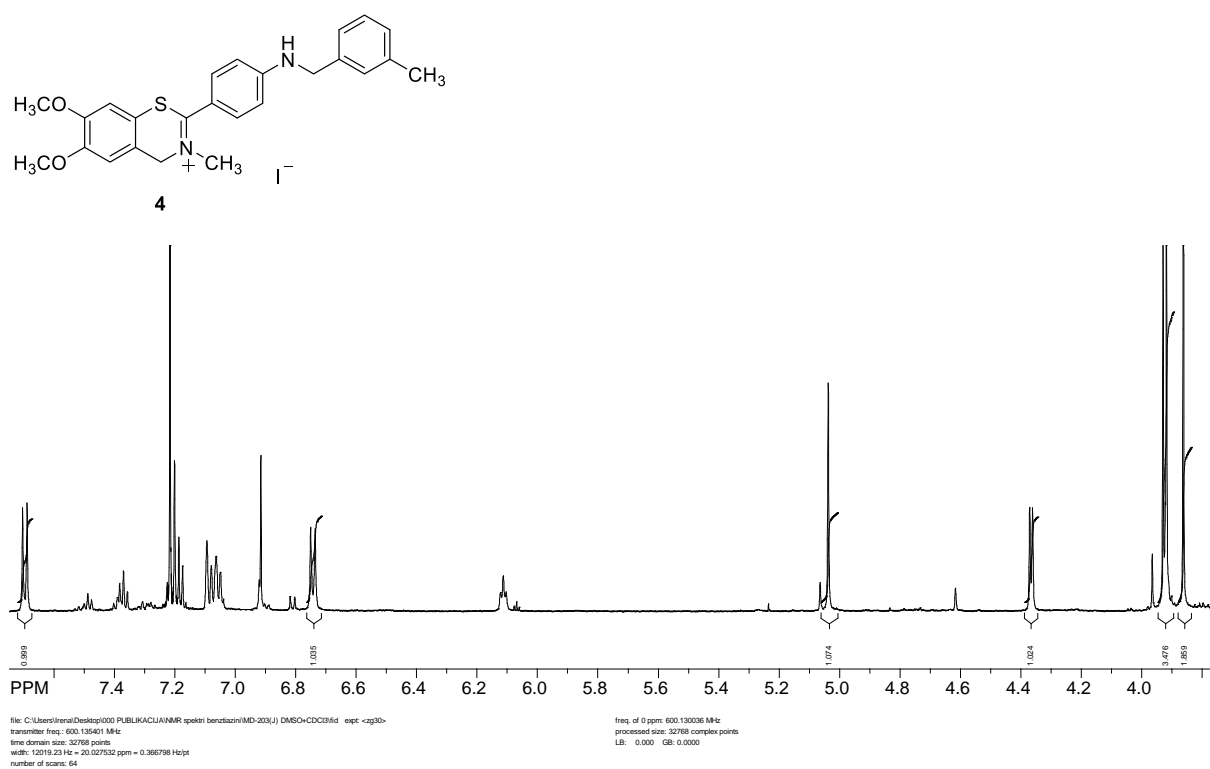

**Figure S39.**  $^1\text{H}$  NMR (CDCl<sub>3</sub> + DMSO) spectrum of benzothiazine **4**.

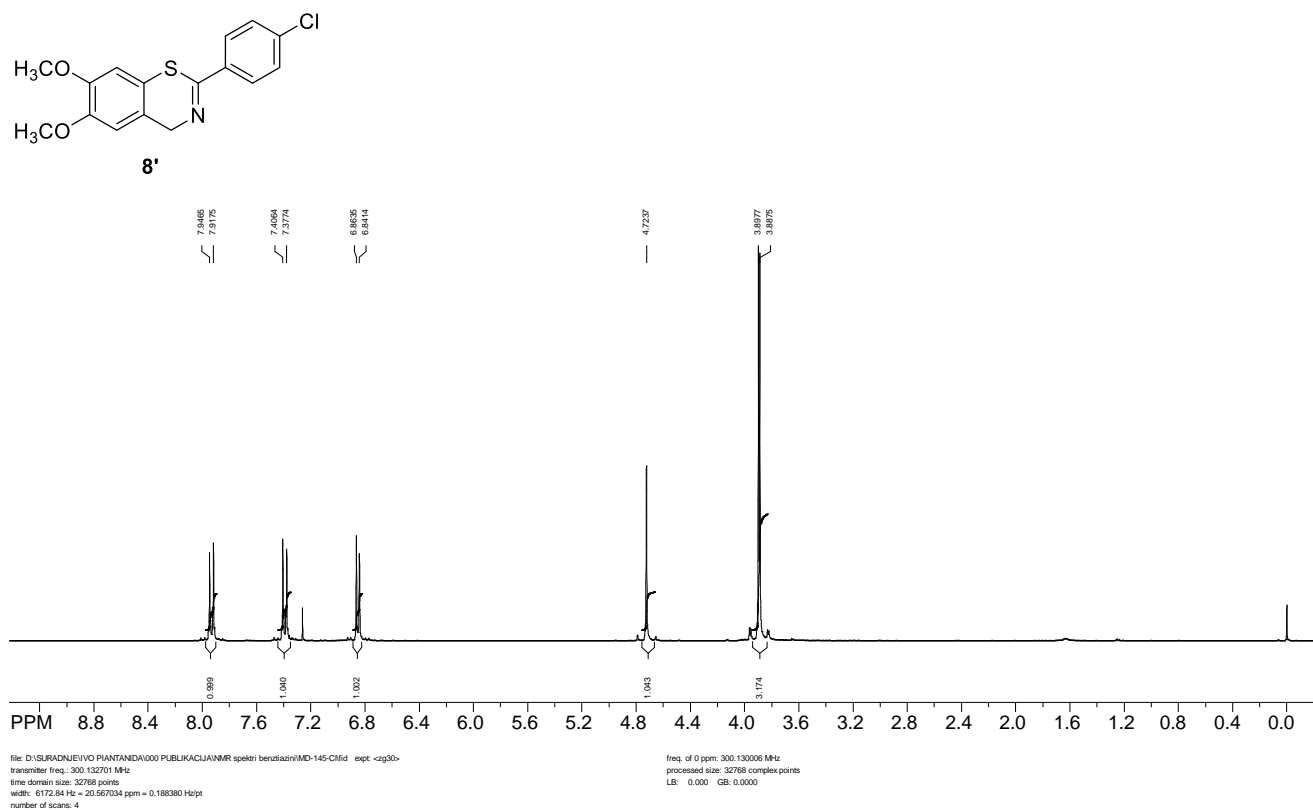

**Figure S40.**  $^1\text{H}$  NMR ( $\text{CDCl}_3$ ) spectrum of benzothiazine **8'**.

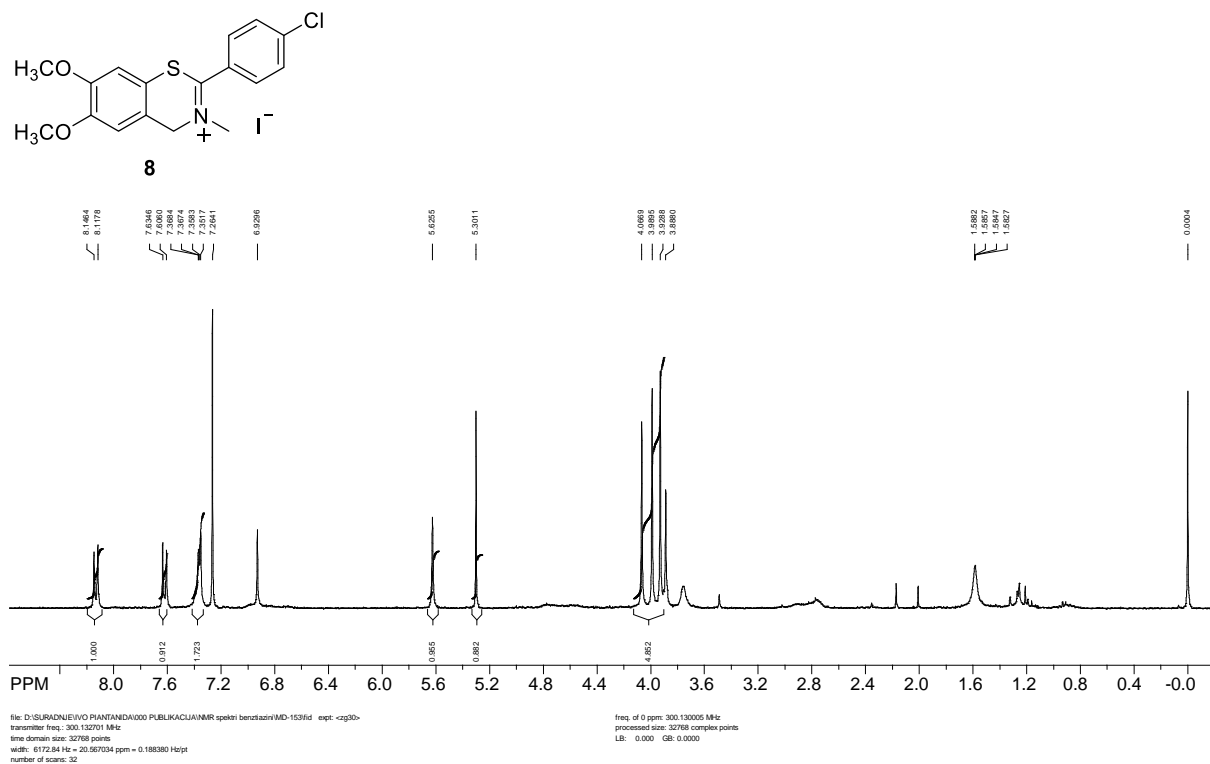

**Figure S41.**  $^1\text{H}$  NMR ( $\text{CDCl}_3$ ) spectrum of benzothiazine **8**.



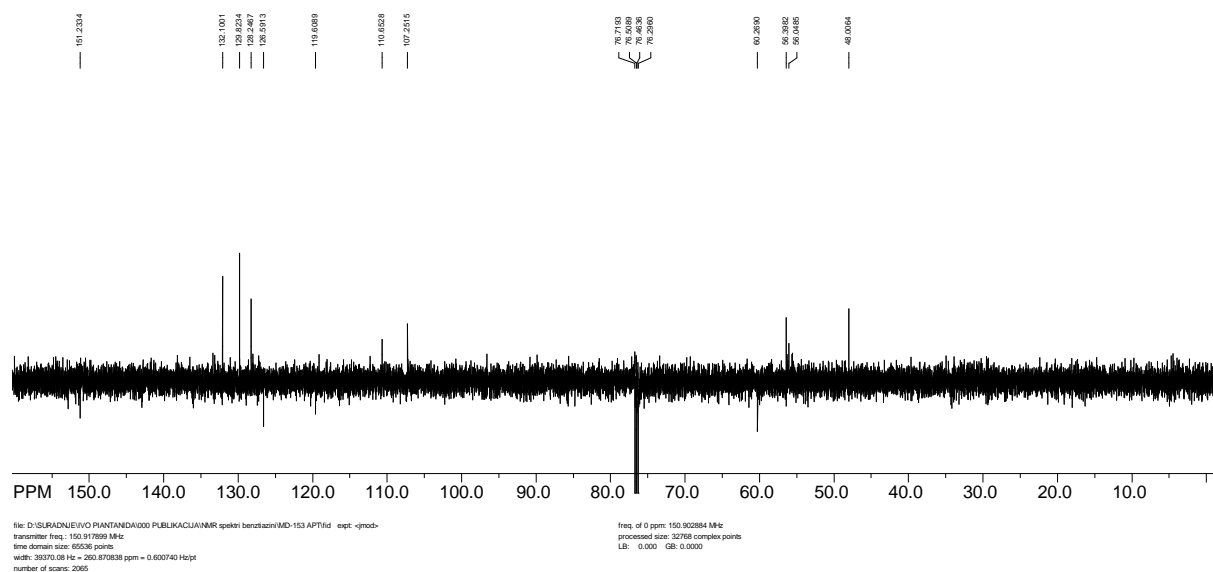

**Figure S42.** APT (CDCl<sub>3</sub>) spectrum of benzothiazine **8**.

#### 4. MS spectra and HRMS analyses of benzothiazines

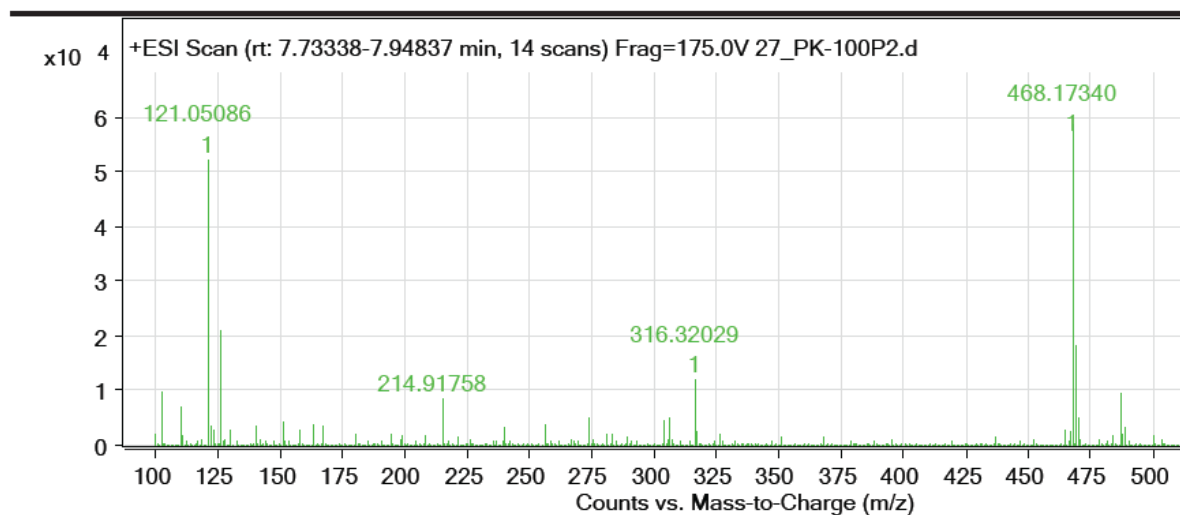

##### Formula Calculator Results

| Formula         | Best | Mass      | Tgt Mass  | Diff (ppm) | Ion Species     | Score |
|-----------------|------|-----------|-----------|------------|-----------------|-------|
| C28 H25 N3 O2 S | True | 467.16615 | 467.16675 | 1.29       | C28 H26 N3 O2 S | 97.59 |

Figure S43. MS spectrum and HRMS analysis of benzothiazine **1'**.

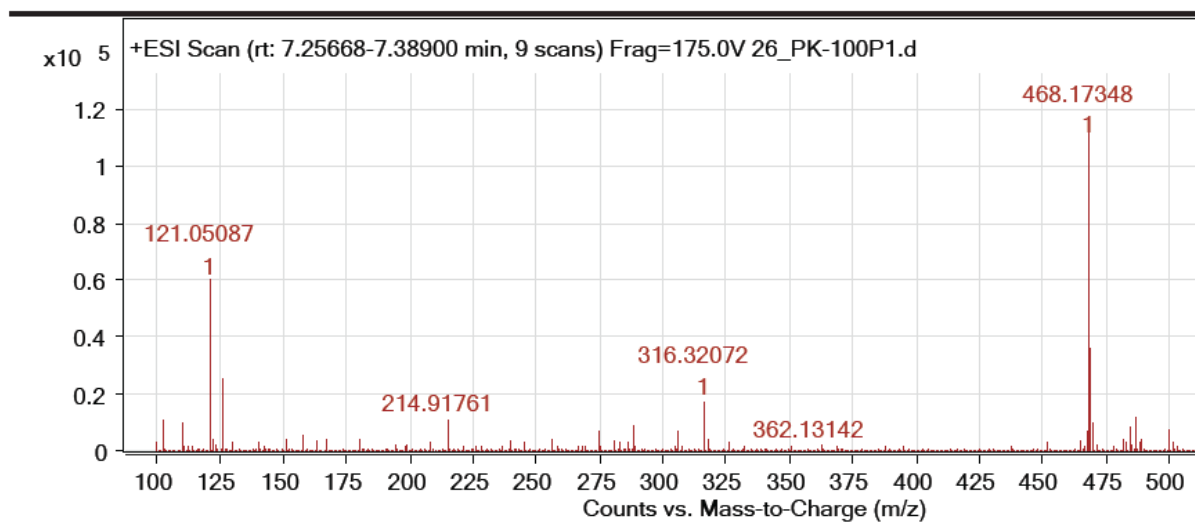

**Formula Calculator Results**

| Formula                                                         | Best | Mass      | Tgt Mass  | Diff (ppm) | Ion Species                                                     | Score |
|-----------------------------------------------------------------|------|-----------|-----------|------------|-----------------------------------------------------------------|-------|
| C <sub>28</sub> H <sub>25</sub> N <sub>3</sub> O <sub>2</sub> S | True | 467.16626 | 467.16675 | 1.05       | C <sub>28</sub> H <sub>26</sub> N <sub>3</sub> O <sub>2</sub> S | 98.64 |

**Figure S44.** MS spectrum and HRMS analysis of benzothiazine **2'**.

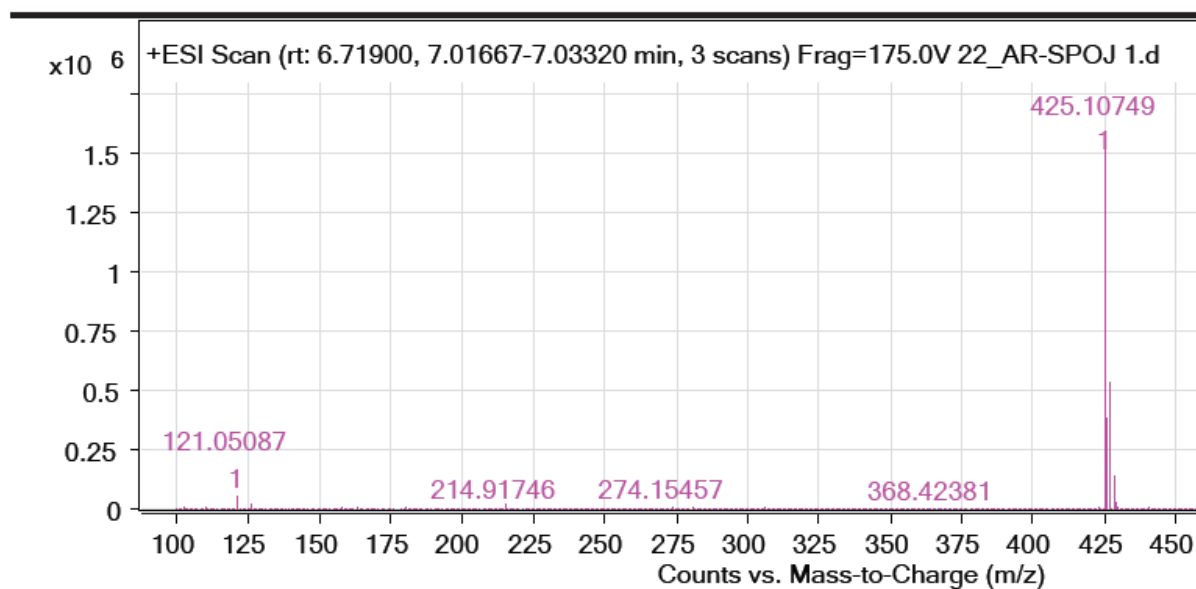

**Formula Calculator Results**

| Formula            | Best | Mass      | Tgt Mass  | Diff (ppm) | Ion Species        | Score |
|--------------------|------|-----------|-----------|------------|--------------------|-------|
| C23 H21 Cl N2 O2 S | True | 424.10042 | 424.10123 | 1.91       | C23 H22 Cl N2 O2 S | 96.17 |

**Figure S45.** MS spectrum and HRMS analysis of benzothiazine **3'**.

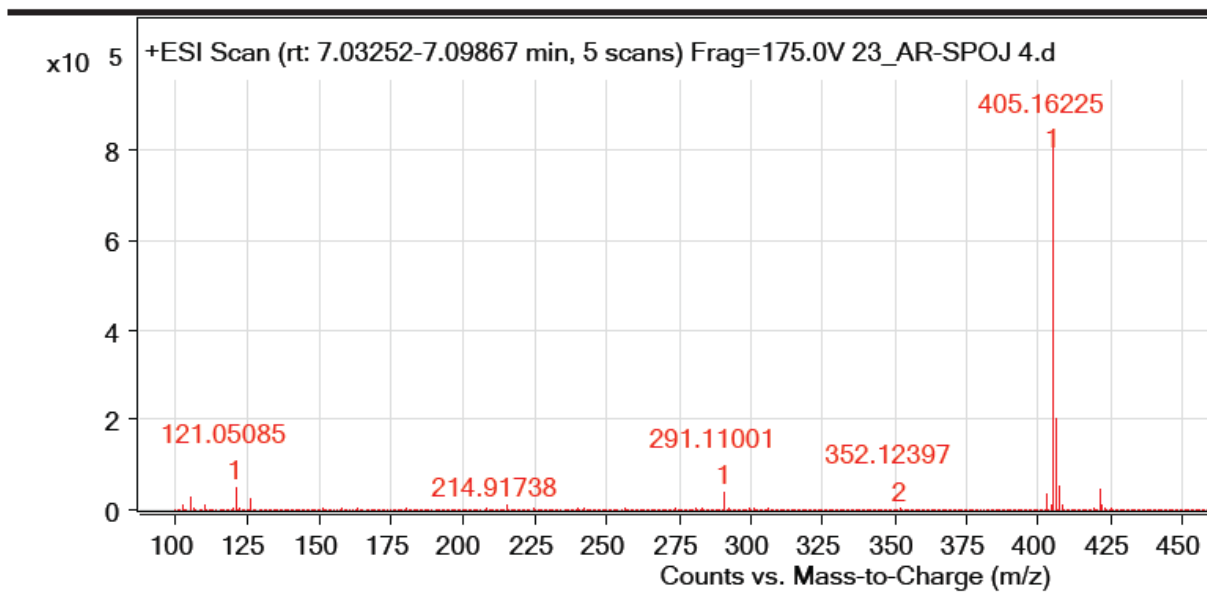

**Formula Calculator Results**

| Formula        | Best | Mass     | Tgt Mass  | Diff (ppm) | Ion Species    | Score |
|----------------|------|----------|-----------|------------|----------------|-------|
| C23 H22 N2 O S | True | 374.1447 | 374.14528 | 1.55       | C23 H23 N2 O S | 88.81 |

**Figure S46.** MS spectrum and HRMS analysis of benzothiazine 4'.

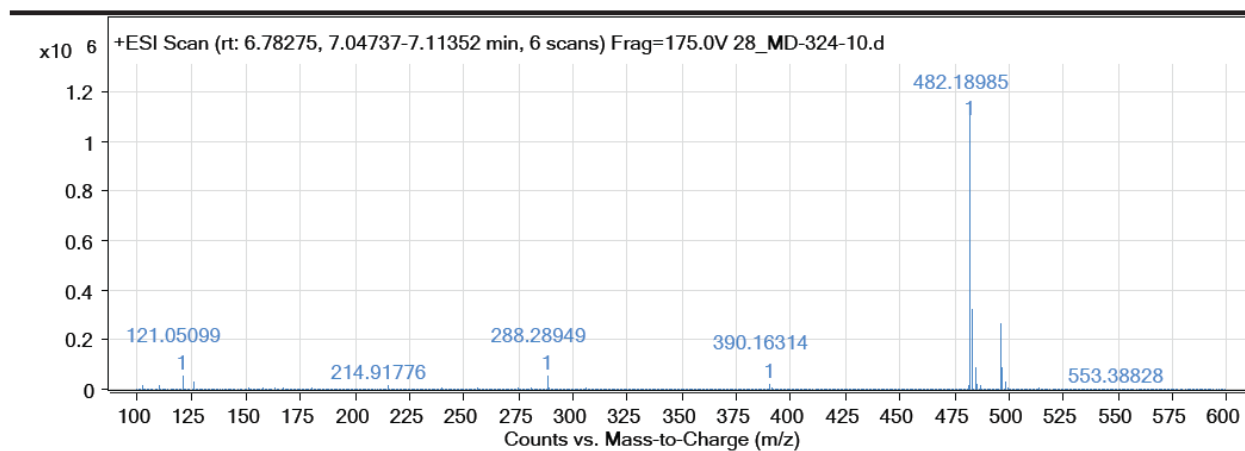

**Formula Calculator Results**

| Formula                                                         | Best | Mass      | Tgt Mass | Diff (ppm) | Ion Species                                                     | Score |
|-----------------------------------------------------------------|------|-----------|----------|------------|-----------------------------------------------------------------|-------|
| C <sub>29</sub> H <sub>27</sub> N <sub>3</sub> O <sub>2</sub> S | True | 481.18269 | 481.1824 | -0.6       | C <sub>29</sub> H <sub>28</sub> N <sub>3</sub> O <sub>2</sub> S | 96.23 |

**Figure S47.** MS spectrum and HRMS analysis of benzothiazine **1**.

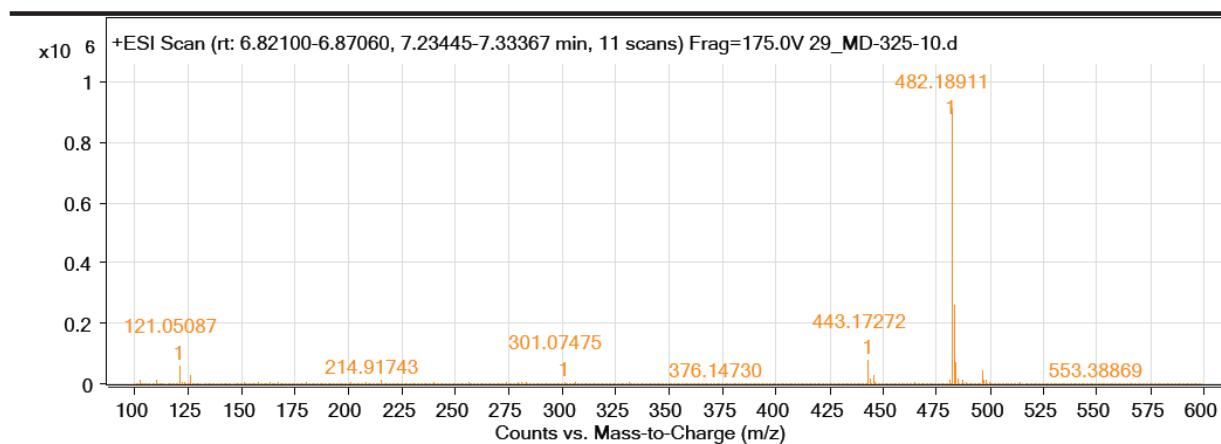

**Formula Calculator Results**

| Formula                                                         | Best | Mass      | Tgt Mass | Diff (ppm) | Ion Species                                                     | Score |
|-----------------------------------------------------------------|------|-----------|----------|------------|-----------------------------------------------------------------|-------|
| C <sub>29</sub> H <sub>27</sub> N <sub>3</sub> O <sub>2</sub> S | True | 481.18198 | 481.1824 | 0.87       | C <sub>29</sub> H <sub>28</sub> N <sub>3</sub> O <sub>2</sub> S | 95.67 |

**Figure S48.** MS spectrum and HRMS analysis of benzothiazine **2**.

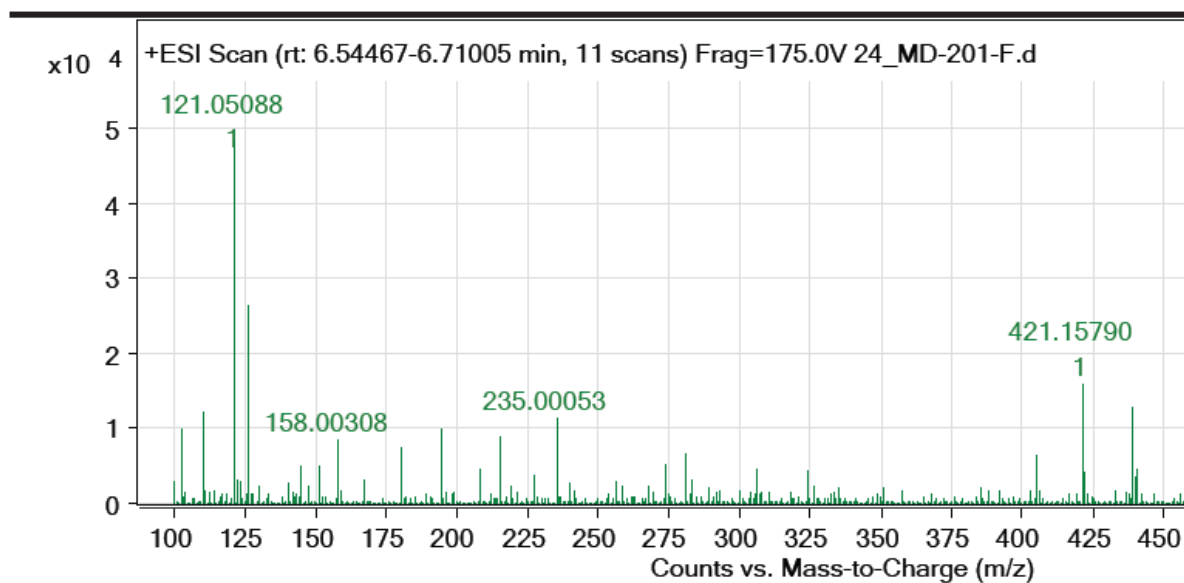

**Formula Calculator Results**

| Formula                                                            | Best | Mass      | Tgt Mass  | Diff (ppm) | Ion Species                                                        | Score |
|--------------------------------------------------------------------|------|-----------|-----------|------------|--------------------------------------------------------------------|-------|
| C <sub>24</sub> H <sub>23</sub> Cl N <sub>2</sub> O <sub>2</sub> S | True | 438.11649 | 438.11688 | 0.89       | C <sub>24</sub> H <sub>24</sub> Cl N <sub>2</sub> O <sub>2</sub> S | 98.33 |

**Figure S49.** MS spectrum and HRMS analysis of benzothiazine **3**.



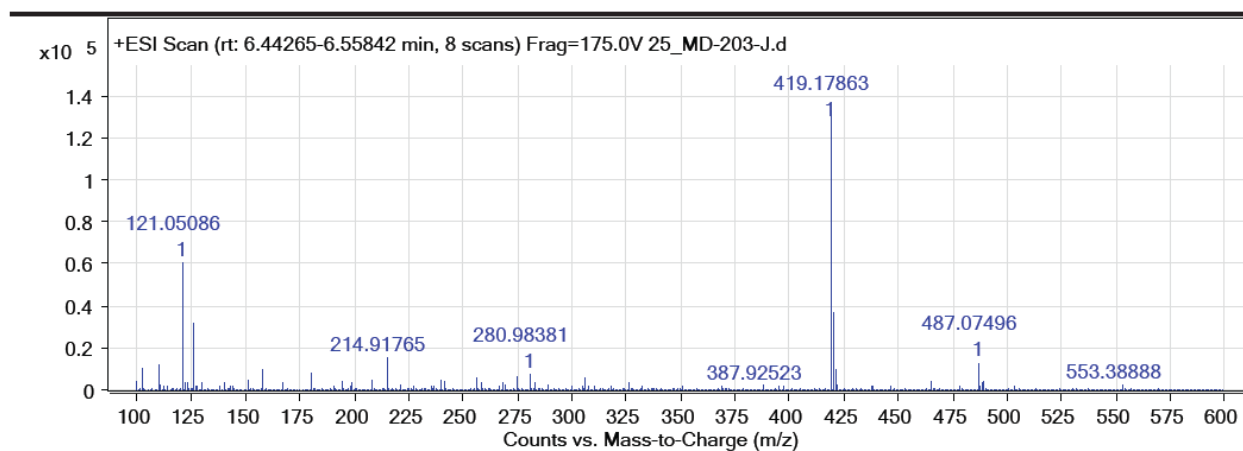

**Formula Calculator Results**

| Formula                                                         | Best | Mass      | Tgt Mass | Diff (ppm) | Ion Species                                                     | Score |
|-----------------------------------------------------------------|------|-----------|----------|------------|-----------------------------------------------------------------|-------|
| C <sub>25</sub> H <sub>26</sub> N <sub>2</sub> O <sub>2</sub> S | True | 418.17131 | 418.1715 | 0.46       | C <sub>25</sub> H <sub>27</sub> N <sub>2</sub> O <sub>2</sub> S | 98.41 |

**Figure S50.** MS spectrum and HRMS analysis of benzothiazine **4**.

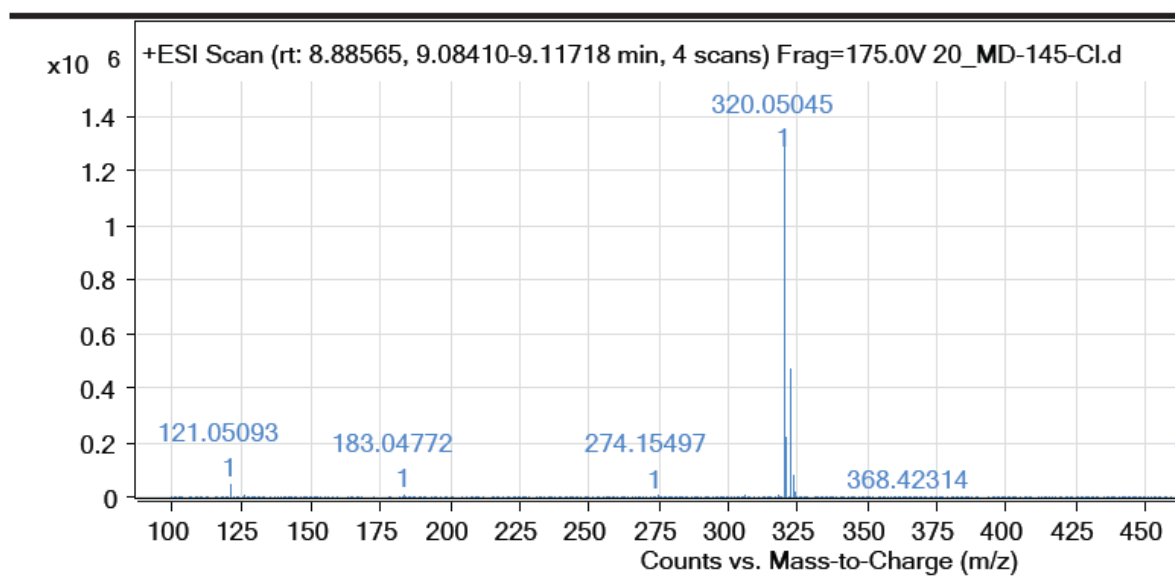

**Formula Calculator Results**

| Formula           | Best | Mass      | Tgt Mass  | Diff (ppm) | Ion Species       | Score |
|-------------------|------|-----------|-----------|------------|-------------------|-------|
| C16 H14 Cl N O2 S | True | 319.04324 | 319.04338 | 0.43       | C16 H15 Cl N O2 S | 99.11 |

**Figure S51.** MS spectrum and HRMS analysis of benzothiazine **8'**.

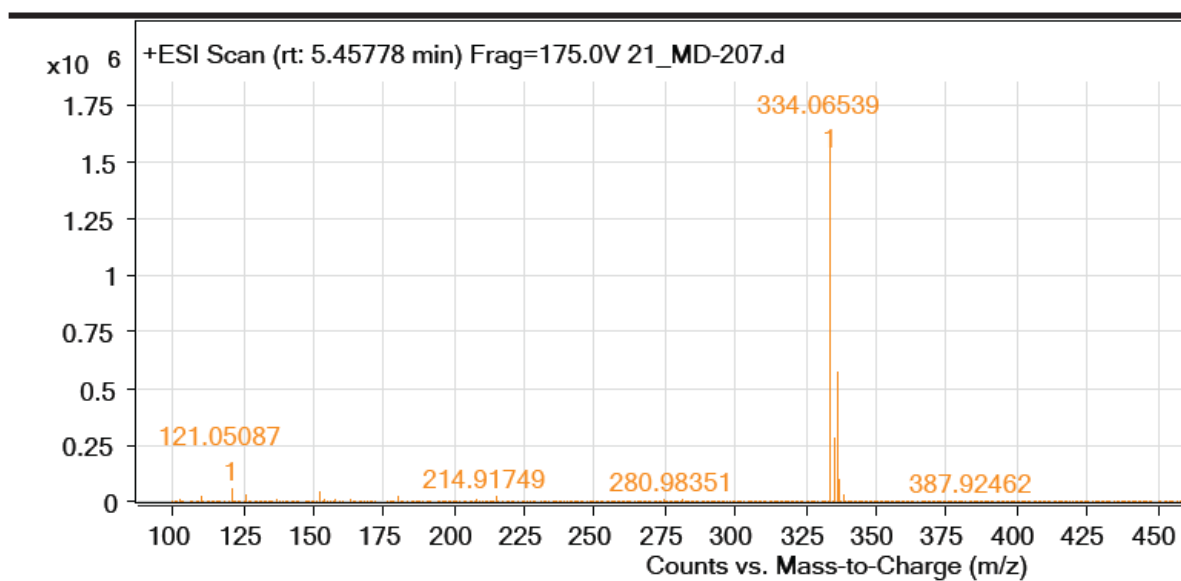

**Formula Calculator Results**

| Formula           | Best | Mass      | Tgt Mass  | Diff (ppm) | Ion Species       | Score |
|-------------------|------|-----------|-----------|------------|-------------------|-------|
| C17 H16 Cl N O2 S | True | 333.05817 | 333.05903 | 2.56       | C17 H17 Cl N O2 S | 96.7  |

**Figure S52.** MS spectrum and HRMS analysis of benzothiazine **8**.
